## Cytoplasmic physical state governs the influence of oxygen on *Pinus densiflora* seed ageing

Davide Gerna<sup>1</sup>, Daniel Ballesteros<sup>2</sup>, Wolfgang Stöggel<sup>1</sup>, Erwann Arc<sup>1</sup>, Charlotte E. Seal<sup>2</sup>, Chae Sun Na<sup>3</sup>, Ilse Kranner<sup>1</sup>, Thomas Roach<sup>1\*</sup>

<sup>1</sup>Department of Botany and Center for Molecular Biosciences Innsbruck (CMBI), University of Innsbruck, Sternwartestraße 15, 6020 Innsbruck, Austria

<sup>2</sup>Department of Comparative Plant and Fungal Biology, Royal Botanic Gardens, Kew, Wakehurst place, Ardingly, United Kingdom

<sup>3</sup>Seed Conservation Research Division, Department of Seed Vault, Baekdudaegan National Arboretum, 2160-53 Munsu-ro, Chunyang-myeon, Bonghwa-gun, Gyeongsangbuk-do, Republic of Korea

\*corresponding author

Davide Gerna: [davide.gerna@uibk.ac.at](mailto:davide.gerna@uibk.ac.at)  
ORCID: 0000-0002-9055-0609

Daniel Ballesteros: [d.ballesteros@kew.org](mailto:d.ballesteros@kew.org)  
ORCID: 0000-0002-8762-4275

Wolfgang Stöggel: [wolfgang.stoeggel@uibk.ac.at](mailto:wolfgang.stoeggel@uibk.ac.at)  
ORCID: 0000-0002-7450-6464

Erwann Arc: [erwann.arc@uibk.ac.at](mailto:erwann.arc@uibk.ac.at)  
ORCID: 0000-0003-2344-1426

Charlotte E. Seal: [c.seal@kew.org](mailto:c.seal@kew.org)

Chae Sun Na: [chaesun.na@bdna.or.kr](mailto:chaesun.na@bdna.or.kr)  
ORCID: 0000-0002-7936-2121

Ilse Kranner: [ilse.kranner@uibk.ac.at](mailto:ilse.kranner@uibk.ac.at)  
ORCID: 0000-0003-4959-9109

Thomas Roach: [thomas.roach@uibk.ac.at](mailto:thomas.roach@uibk.ac.at)  
ORCID: 0000-0002-0259-0468

Date of submission: 2020.12.11

Number of tables: 0; number of figures: 7

Word count: 7402

Supplementary data – Table: 1; Figures: 5

1 **Highlight:** lipid peroxidation occurred during seed ageing in the glassy state and, like viability loss,  
2 could be prevented by hypoxia. Seeds with fluid cytoplasm aged faster and irrespective of oxygen  
3 availability.

#### 4 **Abstract**

5 During desiccation, the cytoplasm of orthodox seeds solidifies in a glass with highly restricted diffusion  
6 and molecular mobility, which extend longevity. Temperature and moisture determine seed cellular  
7 physical state, and oxygen can promote deteriorative reactions of seed ageing. However, whether seed  
8 physical state affects O<sub>2</sub>-mediated biochemical reactions during ageing remains unknown. Here, we  
9 answered this question using oil-rich *Pinus densiflora* seeds aged by controlled deterioration (CD) at  
10 45 °C and distinct relative humidities (RHs), resulting in a glassy (9 and 33% RH) or fluid (64 and 85%  
11 RH) cytoplasm. Regardless of CD regimes, the cellular lipid domain remained always fluid. Hypoxia  
12 (0.4% O<sub>2</sub>) prevented seed deterioration only in the glassy state, limiting non-enzymatic lipid  
13 peroxidation, consumption of antioxidants (glutathione, tocopherols) and unsaturated fatty acids,  
14 accompanied by decreased lipid melt enthalpy and lower concentrations of aldehydes and reactive  
15 electrophile species (RES). In contrast, a fluid cytoplasm promoted faster seed deterioration and  
16 enabled the resumption of enzymatic activities implicated in glutathione metabolism and RES  
17 detoxification, regardless of O<sub>2</sub> availability. Furthermore, seeds stored under dry/cold seed bank  
18 conditions showed biochemical profiles similar to those of CD-aged seeds with glassy cytoplasm under  
19 normoxia. These findings are discussed in the context of germplasm management.

20 **Keywords (6-10):** ageing, antioxidants, controlled deterioration, differential scanning calorimetry,  
21 dynamic mechanical analysis, glass transition, lipid peroxidation, molecular mobility, oxygen,  
22 polyunsaturated fatty acids.

### 23 **Abbreviations**

24 AsA, ascorbic acid; BET, Brunauer-Emmet-Teller; CD, controlled deterioration; Cys, cysteine; Cys-Gly,  
25 cysteinyl-glycine;  $\Delta H$ , enthalpy; DMA, dynamic mechanical analyses; DNPH, 2,4-  
26 dinitrophenylhydrazine; DSC, differential scanning calorimetry; DTT, dithiothreitol; DW, dry weight; EC,  
27 electrical conductivity;  $E_{GSSG/2GSH}$ , half-cell reduction potential of the glutathione/glutathione  
28 disulphide redox couple;  $E_{hc}$ , half-cell reduction potential;  $E^0_{pH}$ , standard half-cell reduction potential  
29 at a defined pH; FA, fatty acid; FAME, fatty acid methyl ester; FW, fresh weight;  $\gamma$ -Glu-Cys,  $\gamma$ -glutamyl-  
30 cysteine; GC-MS, gas chromatography coupled to mass spectrometry; GSH, glutathione; GSSG,  
31 glutathione disulphide; GST, glutathione-S-transferase; HPLC, high-performance liquid  
32 chromatography; LMW, low-molecular-weight; P50, time to decrease seed viability by 50%; PUFA,  
33 polyunsaturated fatty acid; RES, reactive electrophile species; RH, relative humidity; ROS, reactive  
34 oxygen species; RT, room temperature;  $T_{25}$ , time to reach 25% germination; TAG, triacylglycerols; TD-  
35 NMR, time-domain nuclear magnetic resonance; Tg, glass transition temperature; uHPLC-MS/MS,  
36 ultra-high performance liquid chromatography tandem mass spectrometry; UPW, ultrapure water;  
37 WC, water content.

## 38 Introduction

39 The preservation of seed viability and quality during storage is at the basis of plant propagation  
40 and of primary interest for seed banks in agriculture, forestry, and biodiversity conservation (Colville  
41 and Pritchard, 2019; Li and Pritchard, 2009; Whitehouse *et al.*, 2020). The extended longevity of  
42 desiccation tolerant (i.e. orthodox) seeds under dry and cold conditions critically depends on their  
43 ability to tolerate both desiccation to water contents (WCs) lower than 0.1- 0.07 g H<sub>2</sub>O g<sup>-1</sup> dry weight  
44 (DW) and sub-zero temperatures (Walters, 2015). At the low WC and temperature of conventional  
45 storage in seed banks, the cytoplasm of seeds is stabilised by formation of an intracellular glass  
46 (referred to as "glassy state"), resulting from the non-crystalline solidification of the cytoplasmic matrix  
47 and the entrapment of all cellular organelles within (Ballesteros *et al.*, 2020). The glassy cytoplasm  
48 restricts molecular diffusion, decelerating the rates of biochemical reactions implicated in seed  
49 deterioration, thus extending longevity (Sun, 1997; Murthy *et al.*, 2003; Buitink and Leprince, 2008;  
50 Ballesteros and Walters, 2011; Fernández-Marín *et al.*, 2013; Walters *et al.*, 2005a).

51 In addition to the well-studied influence of WC and storage temperature [e.g. viability equations;  
52 (Ellis and Roberts, 1980)], seed longevity is also affected by the gaseous environment during storage.  
53 Early reports describe the advantage of hermetical storage to seed longevity (Harrison and McLeish,  
54 1954; Roberts, 1961), and more recent studies show that elevated O<sub>2</sub> partial pressure shortens seed  
55 longevity (Groot *et al.*, 2012; Groot *et al.*, 2015; Hourston *et al.*, 2020). There is consensus that  
56 oxidative reactions, which cause the accumulation of macromolecular damage, occupy a primary  
57 position in seed ageing and death (McDonald, 1999; Bailly, 2004; Kranner *et al.*, 2006; Rajjou and  
58 Debeaujon, 2008; Kranner *et al.*, 2010; Walters *et al.*, 2010; Kumar *et al.*, 2015; Bailly, 2019). In the  
59 glassy state, limited molecular motion (Ballesteros and Walters, 2011, 2019) is still compatible with  
60 the production of reactive oxygen species (ROS) and the consumption of antioxidants, which influence  
61 seed redox state (Oracz *et al.*, 2009; Bahin *et al.*, 2011; Bazin *et al.*, 2011; Nagel *et al.*, 2015);.

62 Under the restricted molecular mobility and diffusion within the glass, ROS-processing  
63 enzymes cannot access their substrates in the aqueous domain. Hence, low-molecular-weight (LMW)  
64 antioxidants offer the only protection from oxidative damage and include tocopherols in the seed  
65 cytoplasmic lipid domain (e.g. membranes and oil bodies), and glutathione ( $\gamma$ -L-glutamyl-L-cysteinyl-  
66 glycine, GSH) and ascorbate (L-threo-hexenon-1,4-lacton or vitamin C, AsA) in the cytoplasmic aqueous  
67 domain (Kranner *et al.*, 2010). Tocopherols are amphipathic compounds of the vitamin E family  
68 (i.e. tocopherols, tocotrienols, and tocotrienols), which scavenge peroxy (i.e. lipid) radicals and  
69 thus block the propagation phase of lipid peroxidation (Munné-Bosch and Alegre, 2002; Menè-Saffranè  
70 *et al.*, 2010). Typically,  $\alpha$ - and  $\gamma$ -tocopherols are abundant in seeds, particularly in those rich in oil  
71 storage reserves (Smirnoff, 2010; Fernández-Marín *et al.*, 2017). Dry seeds mainly contain the  
72 tripeptide and LMW thiol GSH, and only traces, if any, of AsA (Colville and Kranner, 2010; Gerna *et al.*,

73 2017; Gerna *et al.*, 2018). Both GSH and AsA donate an electron to ROS radicals, subsequently  
74 converting to glutathione disulphide (GSSG) and dehydroascorbic acid, respectively (Tommasi *et al.*,  
75 2001; Kranner *et al.*, 2006). In addition, these two water-soluble antioxidants may also help protect  
76 the lipid phase by regenerating tocopherols from tocopheryl radicals, formed by the scavenging of  
77 peroxy radicals produced during lipid peroxidation (Smirnoff and Wheeler, 2000; Munné-Bosch and  
78 Alegre, 2002; Colville and Kranner, 2010). A broad range of bioactive molecules is released from lipid  
79 peroxides, depending on the type of fatty acid (FA) and how the peroxide decays. The presence of a  
80 carbonyl group confers electrophilicity, which is enhanced when the carbonyl is conjugated to an  
81 alkene (forming an  $\alpha,\beta$ -unsaturated carbonyl), as found in the so-called reactive electrophile species  
82 (RES) (Farmer and Davoine, 2007; Mano *et al.*, 2019). Due to its nucleophilic nature, GSH conjugates  
83 with RES through reactions catalysed by various glutathione-S-transferases (GSTs, EC 2.5.1.18)  
84 enabling detoxification (Roach *et al.*, 2018b; Mano *et al.*, 2019). Less reactive aldehydes are converted  
85 to carboxylic acids by aldehyde dehydrogenases, using NAD(P)<sup>+</sup> as a cofactor (Mano, 2012).  
86 Importantly, GSH is a major cellular redox buffer in dry seeds, and changes in GSH and GSSG  
87 concentrations shift the glutathione half-cell reduction potential ( $E_{\text{GSSG}/2\text{GSH}}$ , i.e. the glutathione redox  
88 state) towards more negative (i.e. more oxidising) values (Schafer and Buettner, 2001; Kranner *et al.*,  
89 2006). An oxidative shift in  $E_{\text{GSSG}/2\text{GSH}}$  has been correlated with seed viability, regardless of ageing  
90 regimes (Kranner *et al.*, 2006; Birtić *et al.*, 2011; Chen *et al.*, 2013; Nagel *et al.*, 2015; Roach *et al.*,  
91 2018a). Nonetheless, the combined effects of changes in molecular mobility and O<sub>2</sub> availability on GSH  
92 metabolism during seed storage, and the potential repercussion on to biochemical changes in the lipid  
93 domain, are not clear.

94 Most studies on the biochemical reactions implicated in seed ageing have been conducted using  
95 protocols of controlled deterioration (CD), consisting in seed exposure to high temperature (e.g. 35-45  
96 °C) and elevated relative humidity (RH, e.g. 60-70%), ensuring fast declines of viability (Powell and  
97 Matthews, 1981; Hay *et al.*, 2008). However, accelerating seed ageing using humid/warm conditions  
98 typical of CD does not always lead to the same biochemical changes that occur in dry/cold storage  
99 conditions of seed banks (Nagel *et al.*, 2015; Roach *et al.*, 2018a; Nagel *et al.*, 2019). For example,  
100 viewed via a lack of changes in FA composition and tocopherol concentrations, the lipid phase  
101 remains relatively stable during CD, even in some cases until viability loss under elevated O<sub>2</sub>  
102 concentrations (Lehner *et al.*, 2008; Morscher *et al.*, 2015; Roach *et al.*, 2018a; Schausberger *et al.*,  
103 2019), whereas tocopherol consumption may occur during cold storage of oily and non-oily seeds  
104 (Seal *et al.*, 2010a; Seal *et al.*, 2010b; Roach *et al.*, 2018a). The physical properties affecting molecular  
105 mobility under these fast (i.e. CD) and slow (i.e. seed bank) ageing regimes can account for different  
106 biochemical responses. During dry and cold storage, the conditions fall below the glass transition  
107 temperature (T<sub>g</sub>), and the seed cytoplasm is in a solid/glassy state (henceforth referred to as glassy).

108 In contrast, elevated RH combined with high temperatures are typically used during CD and lead to  
109 fluidisation of the cytoplasm, which enters a liquid/rubbery state (hereafter referred to as fluid)  
110 (Walters, 1998; Walters *et al.*, 2010; Ballesteros and Walters, 2011).

111 In this paper, we provide a deeper insight into the role of O<sub>2</sub> in seed ageing in both the glassy  
112 and fluid state. We tested the hypothesis that O<sub>2</sub> is detrimental to seed longevity, via promoting lipid  
113 peroxidation, only when seeds are in a glassy state with restricted enzyme activity and limited  
114 protection against oxidative damage. We chose *Pinus densiflora* (Japanese red pine), a widespread  
115 species with oily seed storage reserves, inhabiting coniferous forests in central Asia and of interest for  
116 reforestation (Washitani and Saeki, 1986; Hu *et al.*, 2020). We treated seeds with CD under normoxia  
117 (nominal 21% O<sub>2</sub>) and hypoxia (nominal < 1% O<sub>2</sub>) at various RHs to achieve contrasting intracellular  
118 physical properties. These were determined by dynamic mechanical analysis (DMA) and differential  
119 scanning calorimetry (DSC), which revealed transitions in the visco-elastics and melting properties of  
120 both the aqueous and lipid domains of the cytoplasm (Walters *et al.*, 2010; Ballesteros and Walters,  
121 2011, 2019; Porteous *et al.*, 2019). Sorption isotherms were constructed and assessed to calculate  
122 values of the Brunauer-Emmet-Teller (BET) monolayer, which describes the chemical affinity of a  
123 material for water and is expressed as the WC at which all water-binding sites at the adsorbent surface  
124 are filled with water molecules. The removal of water from the BET monolayer has been proposed to  
125 promote deterioration by exposing macromolecules to O<sub>2</sub> (Labuza, 1980; Buitink *et al.*, 1998;  
126 Ballesteros and Walters, 2007b; Barden and Decker, 2016), and here we studied if removing the BET  
127 monolayer affected biochemical changes accompanying seed deterioration. To characterise the  
128 influence of O<sub>2</sub> on seed redox biochemistry during ageing, we assessed GSH, GSSG, and tocochromanol  
129 concentrations using high-performance liquid chromatography (HPLC), FA profiles with gas-  
130 chromatography coupled to mass-spectrometry (GC-MS), RES and other aldehydes with ultra HPLC-  
131 MS/MS. Furthermore, to clarify whether O<sub>2</sub>-dependent CD-induced processes are representative of  
132 long-term cold storage in the glassy state, seeds stored for 20 years under seed bank conditions were  
133 also analysed.

## 134 **Material and methods**

### 135 **Seed material and storage conditions**

136 All experiments were conducted using *Pinus densiflora* Sieb. et Zucc. (also known as Japanese  
137 red pine) seeds obtained from the National Baekdudaegan Arboretum (Seobyeok-ri, Chungyang-  
138 myeon, Bonghwa-gun, South Korea). In autumn 2015, seeds were harvested from individual trees in  
139 the Gwangneung forest and randomly pooled together. Thereafter, seeds were equilibrated at 30 ±  
140 1.5% RH for about seven weeks and kept until 2019 at -20 ± 2 °C and 56 ± 7% RH, measured with data-

141 loggers (EasyLog, Lascar Electronics Ltd, Whiteparish, UK), in vacuum-sealed laminated  
142 polyamide/polyethylene bags. These seeds were used as "control" and had a WC of 0.04 g H<sub>2</sub>O g<sup>-1</sup> DW  
143 before equilibrating to the WCs used during the various CD regimes. In addition, a historic collection  
144 of seeds, harvested in 1999 from the same location as 2015 with a total germination of 91% in 1999  
145 and kept inside laminated plastic bags at 4 °C and 0.06 g H<sub>2</sub>O g<sup>-1</sup> DW for 15 years (hereafter referred  
146 to as "seed bank" seeds), was available and was included in the study. In 2015, these seed bank seeds  
147 were transferred to -20 °C until analyses in 2019.

## 148 **CD and germination**

149 Approximately 4.5 g of seeds were collected in Manila hemp-cellulose bags (Jeden Tag, Zentrale  
150 Handelgesellschaft GmbH, Offenburg, Germany) and sealed in 1-L glass jars containing 50 mL of LiCl  
151 solutions at 8.6 ± 0.4, 32.9 ± 1.0, 63.9 ± 1.6, and 84.9 ± 1.7% RH and data loggers (EasyLog, Lascar  
152 Electronics Ltd, Whiteparish, UK) to monitor temperature and RH during storage. For each replicate,  
153 the bags containing seeds were placed in separate jars and incubated at room temperature (RT) in the  
154 dark for pre-equilibration to the various RH (Supplementary Table S1 at *JXB* online). During the pre-  
155 equilibration period, sample fresh weights (FWs) were recorded daily and, once they had stabilised  
156 over two consecutive days, the jars were flushed with N<sub>2</sub> to establish hypoxia. This was defined *a priori*  
157 as O<sub>2</sub> concentrations < 1% inside the jars, detected with oxygen sensor spots (PSt3) inside the glass jars  
158 in conjunction with a fibre optic O<sub>2</sub> meter (Fibox 3, PreSens Precision Sensing GmbH, Regensburg,  
159 Germany). Subsequently, seeds were further equilibrated at RT in the dark for two days, before starting  
160 CD at 44.5 ± 0.4 °C under normoxia (19.6 ± 1.5% O<sub>2</sub>) and hypoxia (0.4 ± 0.5% O<sub>2</sub>). At regular intervals  
161 during CD, O<sub>2</sub> concentrations of all replicates were monitored, while keeping jars at 44.5 ± 0.4 °C.  
162 Details on the CD regimes, including duration of individual treatments, average temperature, RH, and  
163 O<sub>2</sub> concentration, and seed WC values are summarised in Supplementary Table S1.

164 The design of CD experiments aimed at elucidating the effects of O<sub>2</sub> depletion on viability,  
165 biophysical, and biochemical changes between seeds aged for the same duration at the same  
166 temperature and RH, targeting a 50% viability loss (P50) under normoxia only. This approach allowed  
167 comparisons between seeds subjected to CD with the same physical state but under normoxia or  
168 hypoxia. Pilot CD experiments were conducted at about 30, 60, 80, and 100% RH and 45 °C under  
169 normoxia to define the duration of CD intervals to reach P50. At least three intervals for each RH were  
170 used to estimate the P50 values of seeds aged at all pre-tested RHs via probit analysis (Ellis and Roberts,  
171 1980). At 9% RH, P50 was predicted by plotting the experimental P50 values at 30, 60, 80, and 100%  
172 RH against their corresponding WCs (Supplementary Fig. S2). Based on the CD pilot studies, seed  
173 viability was assessed by scoring total germination after different CD intervals, depending on RH  
174 (Supplementary Table S1). Fifty seeds per replicate were sown in Petri dishes containing three layers

175 of filter paper (Whatman grade 1, GE healthcare, Little Chalfont, United Kingdom) and imbibed with 4  
176 mL of ultrapure water (UPW), prior to germination at 20 °C with a 14 h day ( $47 \pm 3 \mu\text{mol m}^{-2} \text{s}^{-1}$ ) : 10 h  
177 night photoperiod. A seed was considered germinated when radicle length exceeded seed length.  
178 Scoring total germination ceased when microbial contamination led to first signs of seed  
179 decomposition, generally two weeks after the last seed had germinated. The effects of CD under  
180 normoxia and hypoxia on germination speed, a proxy for seed vigour, were estimated by calculating  
181 the time to reach 25% germination ( $T_{25}$ ) according to the following equation adapted from (Farooq *et*  
182 *al.*, 2005):

$$(1) \quad T_{25} = t_i + \frac{\left(\frac{N}{4} - n_i\right) (t_j - t_i)}{(n_j - n_i)}$$

184 where  $N$  is the total number of seeds per replicate,  $n_j$  and  $n_i$  the cumulative numbers of seeds  
185 germinated between consecutive scorings at time  $t_j$  and  $t_i$ , when  $n_i < N/4 < n_j$ .

## 186 **Biophysical analyses**

### 187 ***Dynamic Mechanical Analysis***

188 DMA was conducted to measure structural relaxations and determine the  $T_g$  of *P. densiflora*  
189 seeds based on the visco-elastic properties of their cytoplasm (Ballesteros and Walters, 2011, 2019).  
190 DMA and not DSC was selected due to higher sensitivity to detect the  $T_g$  of dry seeds (Ballesteros and  
191 Walters, 2011, 2019). Prior to DMA, seed aliquots from the various CD regimes were all re-equilibrated  
192 to the same WC (about  $0.04 \text{ g H}_2\text{O g}^{-1} \text{ DW}$ ).

193 After removing the seed coat with a scalpel, the visco-elastic properties of the endosperm of  
194 seeds equilibrated at defined RHs were determined with a DMA-1 analyser (Mettler Toledo GmbH,  
195 Greifensee, Switzerland) over temperatures ranging from -120 to +90 °C. The chosen seed WCs were  
196 in equilibrium with the RHs used for CD and extended from 9 to 85% RH. The DMA tests were  
197 conducted in compression mode, using spacers to allow clamping of individual seeds in a 1-mm gap.  
198 DMA scans of individual seeds were acquired on at least two different seeds for each WC. Static and  
199 dynamic forces were set at 200 and 165 mN, respectively, and delivered at a frequency of 1 Hz  
200 (Ballesteros and Walters, 2011, 2019). Prior to analyses, samples were cooled from RT to -120 °C in  
201 about 10 min using a stream of liquid nitrogen. Thereafter, samples were held isothermally at -120 °C  
202 for 1 min and heated to 90 °C at a rate of  $3 \text{ °C min}^{-1}$ . Storage modulus, loss modulus, and  $\tan \delta$  (i.e. loss  
203 modulus/storage modulus) were calculated from the heating scans using the software Stare v12.0  
204 (Mettler Toledo, Greifensee, Switzerland), and only  $\tan \delta$  curves were used to measure the different



205 structural relaxations. Large steps or first order peaks of  $\tan \delta$  are related to structural relaxations and  
206 phase changes in the seed cytoplasm, which can indicate either the transition from solid to fluid of  
207 amorphous solids or the melting of lipid and water crystals (Ballesteros and Walters, 2011). Peaks of  
208  $\tan \delta$  are conventionally labelled with Greek letters ( $\alpha$ ,  $\beta$ ,  $\gamma$ , etc.) from the highest to the lowest  
209 temperature, and  $\alpha$  relaxations typically correspond to the largest signal in DMA scans (Ballesteros and  
210 Walters, 2011). The  $T_g$  was determined from the  $\alpha$  relaxation peaks, as previously characterised in  
211 other seeds and fern spores (Ballesteros and Walters, 2011, 2019; López-Pozo *et al.*, 2019).

### 212 **Differential Scanning Calorimetry**

213 The melting transitions of seed storage lipids (i.e. triacylglycerol [TAG]) were detected and  
214 characterised using DSC analyses (Vertucci, 1992; Crane *et al.*, 2003; Walters *et al.*, 2005b), enabling  
215 an extensive comparison of the physical and structural status of *P. densiflora* seeds after CD at different  
216 RHs under normoxia and hypoxia. As for DMA, aliquots of seeds subjected to the different CD regimes  
217 were equilibrated at the same WC of 0.04 g H<sub>2</sub>O g<sup>-1</sup> DW. After removing the seed coat and excising  
218 embryonic axes, melting transitions were determined on both embryonic axes and endosperm using a  
219 differential scanning calorimeter DSC-1 (Mettler-Toledo, Greifensee, Switzerland), calibrated for  
220 temperature (156.6 °C) and energy (28.54 J g<sup>-1</sup>) with indium standards. Samples were cooled from 25  
221 to -150 °C at a rate of 10 °C min<sup>-1</sup>, held isothermally for 1 min, before heating from -150 to 90 °C at a  
222 rate of 10 °C min<sup>-1</sup>. TAG melting transitions were detected as first order transitions (i.e. peaks) from  
223 seed heating thermograms (Vertucci, 1992; Crane *et al.*, 2003; Walters *et al.*, 2005b; Ballesteros and  
224 Walters, 2007b). The onset temperature of the TAG melting transitions was calculated from the  
225 intersection between the baseline and a line drawn from the steepest portion of the transition peak.  
226 Multiple peaks were detected for the TAG melting transitions and represented diverse TAGs or diverse  
227 crystalline structures of the same TAG, depending on their melting temperature (Crane *et al.*, 2003;  
228 Walters *et al.*, 2005b; Ballesteros and Walters, 2007b). The enthalpy ( $\Delta H$ ) of the total TAG melting  
229 transition was obtained from the area encompassed by all lipid peaks (i.e. L1 and L2) and the baseline  
230 (Ballesteros and Walters, 2007b). All analyses were performed using Mettler-Toledo Stare software  
231 version 12.0 (Mettler-Toledo, Greifensee, Switzerland). Scans were initially acquired using separated  
232 embryos and endosperm, indicating that the melting of TAGs was equivalent in both seed structures  
233 (data not shown). However, all results from the DSC analyses presented in this paper refer to seed  
234 endosperm only, because six to ten embryonic axes per replicate were required to obtain sufficient  
235 signal in the DSC scans, compared to the endosperm of individual seeds. Enthalpies of exothermic and  
236 endothermic events were expressed on a DW basis, after drying seed endosperms to 0.04-0.05 g H<sub>2</sub>O  
237 g<sup>-1</sup> DW in chambers set at RT and various RHs as described in (Ballesteros and Walters, 2007b). For  
238 each CD regime, DSC scans were acquired on at least four seed endosperms, used as replicates.

239 **Water sorption isotherms**

240 Water sorption isotherms were constructed at 45 °C (i.e. the temperature used for the CD  
241 regimes under normoxia and hypoxia) for RHs ranging between 0.5 and 75%. WC-RH data for RH ≤ 40%  
242 were fit to the BET model to calculate parameters related to surface area and chemical affinity for  
243 water or frozen-in structure of glasses, as described earlier for seeds and fern spores (Ballesteros and  
244 Walters, 2007b, 2011, 2019). After recording the FWs, seeds were dried at 103 °C for 16 h to obtain  
245 the DWs. Seed WCs were calculated as the difference between FW and DW and expressed as g H<sub>2</sub>O g<sup>-1</sup>  
246 DW. For each RH, the WCs of five individual seeds were determined between 7 and 30 d after  
247 incubation in RH chambers (i.e. the period during which WC reached a steady-state) and averaged.

248 **Biochemical analyses**

249 After CD, pools of 40 seeds for each CD regime and replicate, including control seeds from 2015  
250 and seed bank seeds, were immediately frozen in liquid nitrogen and lyophilised for 5 d. Seed WC was  
251 expressed as g H<sub>2</sub>O g<sup>-1</sup> DW after recording FW (i.e. before lyophilisation) and DW (i.e. after  
252 lyophilisation) with an XS105 analytical balance (Mettler Toledo GmbH, Columbus, OH, USA). Material  
253 for analyses was obtained from seeds pre-cooled for 15 min in 5-mL Teflon capsules (Sartorius GmbH,  
254 Göttingen, Germany), containing a 10 mm-diameter agate bead, and ground to a fine powder using a  
255 Mikro-Dismembrator S (B. Braun, Biotech International, Melsungen, Germany) at 3,000 rpm for 30 s.  
256 Until analysis, ground samples were stored at -80 °C in a hermetically sealed plastic container with  
257 silica gel. All biochemical analyses were conducted using ground seed powder and all chemicals listed  
258 hereafter were of analytical grade and purchased from Sigma-Aldrich (St. Louis, MO, USA), unless  
259 otherwise specified. All solutions were prepared in UPW.

260 **HPLC analysis of low-molecular-weight thiol-disulphide redox couples**

261 For each replicate ( $n = 4$ ),  $50.0 \pm 0.6$  mg of seed powder was combined with  $24.9 \pm 0.8$  mg of  
262 polyvinylpyrrolidone, and thiols and disulphides were extracted in 1 mL of ice-cold 0.1 M HCl using  
263 a Tissue-Lyser (Qiagen, Hilden, Germany) and two 3-mm glass beads (30 Hz, 4 min). After a first  
264 centrifugation step (28,000 g, 20 min, 4 °C), 700 µL of the supernatants was promptly transferred to a  
265 new Eppendorf tube and further centrifuged (28,000 g, 20 min, 4 °C), according to (Schausberger *et*  
266 *al.*, 2019). Thereafter, extracts were divided into two separate aliquots: 120 µL for the quantification  
267 of both LMW thiols and disulphides (aliquot A), and 400 µL for the quantification of disulphides only  
268 (aliquot B). Briefly, after verifying that the pH of extracts lay between 8.00 and 8.30, dithiothreitol  
269 (DTT) was used to reduce disulphides in aliquot A. To determine disulphides only, thiols of aliquot B  
270 were first blocked with *N*-ethylmaleimide before reduction by DTT. In both aliquots, thiols were  
271 derivatised with monobromobimane for detection by fluorescence (excitation: 380 nm; emission: 480

272 nm) after separation of cysteine (Cys),  $\gamma$ -glutamyl-cysteine ( $\gamma$ -Glu-Cys), cysteinyl-glycine (Cys-Gly), and  
273 GSH, using a reserved phase HPLC 1100 system (Agilent Technologies, Inc., Santa Clara, CA, USA) with  
274 a ChromBudget 120-5-C18 column (250 x 4.6 mm, 5.0  $\mu$ m particle size, Bischoff GmbH, Leonberg,  
275 Germany). The concentrations of LMW thiols and corresponding disulphides were calculated using  
276 external standards and by subtracting the concentration of disulphides (in thiol equivalents) from the  
277 concentration of thiols and disulphides, as described earlier (Bailly and Kranner, 2011).

### 278 **Calculation of $E_{\text{GSSG}/2\text{GSH}}$**

279 The glutathione half-cell reduction potential ( $E_{\text{GSSG}/2\text{GSH}}$ ) was calculated from the molar  
280 concentrations of GSH and GSSG, estimated using seed WCs (expressed as g H<sub>2</sub>O g<sup>-1</sup> seed DW),  
281 according to the Nernst equation (equation 2):

$$(2) \quad E_{\text{GSSG}/2\text{GSH}} = E^0_{\text{pH}} - \frac{RT}{nF} \ln \frac{[\text{GSH}]^2}{[\text{GSSG}]}$$

282

283 where  $R$  is the gas constant (8.314 J K<sup>-1</sup> mol<sup>-1</sup>);  $T$ , temperature in K;  $n$ , number of transferred electrons  
284 (2 GSH  $\rightarrow$  GSSG + 2 H<sup>+</sup> + 2 e<sup>-</sup>);  $F$ , Faraday constant (9.649 x 10<sup>4</sup> C mol<sup>-1</sup>);  $E^0_{\text{pH}}$ , standard half-cell reduction  
285 potential ( $E^0$ ) of a thiol-disulphide redox couple at a defined pH (Schafer and Buettner, 2001; Kranner  
286 *et al.*, 2006).

287 In thiol-disulphide redox couples, the concentration of hydrogen ions affects the half-cell  
288 reduction potential ( $E_{\text{hc}}$ ) (Wardman, 1989), therefore the cytoplasmic pH of control, CD-aged, and seed  
289 bank seeds was estimated as previously reported by (Nagel *et al.*, 2019) with minor modifications. For  
290 each treatment, four replicates of 50.23  $\pm$  0.52 mg of ground seed powder were suspended in 1.2 mL  
291 of UPW and shaken at 600 rpm and 100 °C for 10 min. Following centrifugation (15,000 g, 30 min, RT),  
292 the supernatants were transferred to fresh Eppendorf tubes and their pH measured using a Multi 3410  
293 pH meter with an ADA S7MDS electrode (VWR International, Wien, Austria). To account for  
294 acidification due to interfering compounds released from organelles during extraction of seed powder,  
295 a correction factor of +0.6, obtained as difference between the cellular physiological pH (7.30) and the  
296 highest pH measured in extracts of control seeds (6.70), was applied as detailed by (Nagel *et al.*, 2019).  
297 The  $E^0_{\text{pH}}$  was calculated using the average cytoplasmic pH of each extract according to equation 3:

$$(3) \quad E^0_{\text{pH}} = E^0 + [(pH - 7.0) \times \left(\frac{\Delta E}{\Delta pH}\right)]$$

299 where  $E^0$  is the standard half-cell reduction potential of a thiol-disulphide redox couple at an assumed  
300 cellular pH of 7.0 ( $E^0_{\text{GSSG}/2\text{GSH}} = -258$  mV), and  $\Delta E/\Delta pH$  refers to the change in the  $E_{\text{hc}}$  in response to a

301 one-unit pH change. This value equals -59.1 mV at 25 °C for all LMW thiols (Schafer and Buettner,  
302 2001). To show the effect of CD on  $E_{GSSG/2GSH}$  without the influence of different seed WCs, the  $E_{GSSG/2GSH}$   
303 values of seeds before CD were also estimated at each WC corresponding to the four RHs used for CD.

#### 304 ***HPLC analysis of tocochromanols***

305 Tocochromanols in  $50.3 \pm 0.4$  mg DW of ground seed powder were extracted in 750  $\mu$ L of ice-  
306 cold heptane, using two 3-mm diameter glass beads (Carl Roth GmbH+Co, Karlsruhe, Germany) and a  
307 Tissue-Lyser (Qiagen, Hilden, Germany) at 25 Hz for 2 min. After centrifugation (28,000 g, 40 min, 4  
308 °C), tocochromanols in 20  $\mu$ L of supernatant were separated by an HPLC 1100 system (Agilent  
309 Technologies, Inc., Santa Clara, CA, USA) on a LiChroCART® column (LiChrospher 100 RP-18, 125 x 4  
310 mm, 5.0  $\mu$ m particle size, Merck KGaA, Darmstadt, Germany), with constant flow rate of 1 mL min<sup>-1</sup> of  
311 100% solvent A (acetonitrile : methanol = 74:6) from 0 to 4 min, followed by a gradient changing with  
312 linearity to 100% solvent B (methanol : hexane = 5:1) between 4 and 9 min and maintained at 100% up  
313 to 20 min. Tocochromanols were detected by fluorescence (excitation: 295 nm; emission: 325 nm) and  
314 identification and quantification were based on authentic external standards of  $\alpha$  and  $\gamma$ -tocopherol.

#### 315 ***uHPLC-MS/MS analysis of aldehydes and RES***

316 LMW carbonyls in  $51.58 \pm 2.17$  mg DW of ground seed powder were extracted in 1 mL of  
317 acetonitrile containing 0.5  $\mu$ M 2-ethylhexanal (as internal standard) and 0.05% (w/v) butylated  
318 hydroxytoluene, by shaking with two 3-mm glass beads for 2 min at 30 Hz with a Tissue-Lyser (Qiagen,  
319 Hilden, Germany). After 5 min in an ice-cold ultrasonic bath, extracts were incubated at 60 °C for 30  
320 min before centrifugation (21,500 g, 20 min, 4 °C). The supernatant was removed, and 12.5  $\mu$ L of 20  
321 mM 2,4-dinitrophenylhydrazine (DNPH) dissolved in acetonitrile and 19.4  $\mu$ L of formic acid were added  
322 to the pellet and incubated at RT for 1 h in the dark. Before injection, samples were diluted 50:50 with  
323 UPW. LMW carbonyls were separated using a reversed-phase column (NUCLEODUR C18 Pyramid, EC  
324 50/2, 50x2 mm, 1.8  $\mu$ m, Macherey-Nagel, Düren, Germany), using an Ekspert ultraLC 100 UHPLC  
325 system (AB SCIEX, Framingham, MA, USA) coupled to a QTRAP 4500 MS for quantification of DNPH-  
326 derived aldehydes, according to (Roach *et al.*, 2017). Selected carbonyl-DNPH compounds were also  
327 quantified using external standards, which were processed and derivatised as for samples and are  
328 shown in Supplementary Fig. S4. Peak areas were normalised relative to the internal standard and  
329 concentrations were calculated according to calibration curves using the software Analyst and  
330 MultiQuant (AB SCIEX, Framingham, MA, USA).

#### 331 ***Seed oil content, electrical conductivity, and GC-MS analysis of fatty acids***

332 *P. densiflora* seeds were non-invasively quantified for their total oil content using time-domain  
333 nuclear magnetic resonance (TD-NMR), according to (Castillo-Lorenzo *et al.*, 2019). Three replicates of  
334 15 - 20 intact seeds, equilibrated to ~30% RH, were placed in a Bruker mq20 minispec (Bruker,  
335 Coventry, UK) with a 0.47 Tesla magnet (20 MHz proton resonance frequency) at 40 °C, using a 10-mm  
336 probe assembly (H2O-10-25AVGX4). The method acquired 16 scans with a recycle delay of 2 s.  
337 Quantification was achieved by using sunflower oil for calibration, and data were expressed as  
338 percentage of oil content (w/w).

339 Electrolyte leakage during imbibition was used as indicator of membrane integrity (Matthews  
340 and Powell, 2006). Control, CD-aged, and seed bank seeds were rinsed with UPW for 15 s to remove  
341 surface-bound particles, before imbibing in 6 mL of UPW equilibrated at  $20 \pm 0.5$  °C. During sample  
342 stirring at this constant temperature, the electrical conductivity (EC) of leachates released from 25  
343 seeds was measured with a Cond 330i conductivity meter (WTW Xylem Analytics Germany Sales GmbH  
344 & Co. KG, Weilheim, Germany) connected to a TetraCon® 325 measuring cell probe, 4 h after the onset  
345 of seed imbibition. The values were normalised to seed DW, after drying samples at 103 °C for 17 h.

346 FAs were quantified after derivatisation to FA methyl esters (FAMES) via GC-MS, as described by  
347 (Li-Beisson, 2010). The transesterification reaction was initiated by mixing  $10.14 \pm 0.40$  mg of finely  
348 ground and freeze-dried seed powder in 2 mL of a mixture of methanol: toluene: sulphuric acid  
349 (10:3:0.25, v:v:v) supplemented with 0.01% (w/v) butylated hydroxytoluene and containing 200 µg of  
350 heptadecanoic acid (solved in methanol: toluene, 10:3, v/v) as internal standard. After incubation at  
351 80 °C and 600 rpm for 90 min, samples were cooled down to RT, before adding 760 µL of hexane and  
352 2.3 mL of 0.9% (w/v) NaCl. Thereafter, samples were vortexed at full speed and centrifuged (3,000 g,  
353 10 min, RT). The supernatants were collected in autosampler vials, injected and FAMES separated using  
354 a Trace 1300 GC coupled to a TSQ8000 triple quadrupole MS (Thermo-Scientific, Waltham, MA, U.S.A.),  
355 equipped with a 30-m Rxi-5Sil MS column including a 10-m integra-guard pre-column (Restek  
356 Corporation, Bellefonte, PA, USA). A commercial FAMES mix (Sigma Aldrich ref. 18919, Missouri USA)  
357 was used to confirm the identity of the FAMES. Data analysis was performed using the Xcalibur  
358 software v. 4.2 (Thermo-Scientific, Waltham, Massachusetts, USA).

## 359 **Statistics**

360 All data were assessed for significance at  $\alpha = 0.05$  using the SPSS Statistics software package v.  
361 25 (IBM, New York, NY, USA). CD under normoxia at low RH (i.e. 9 and 33%) resulted in different seed  
362 viability compared to hypoxia, thus individual *t*-tests were run to compare control seeds before CD  
363 with seeds exposed to each individual CD regime. Additional *t*-tests were run to compare the effects  
364 of O<sub>2</sub> on biochemical and biophysical measurements between seeds aged at the same RH. The  
365 assumption of normal distribution was verified via Shapiro-Wilk test and analysis of quantile-quantile

366 plots. Total germination (%) and WC (% FW) values were arcsine transformed to simulate normal  
367 distribution. The assumption of homoscedasticity of variances was assessed through Levene's test and  
368 analysis of the residuals plotted against fitted values. Whenever the latter assumption was not fulfilled,  
369 Box-Cox transformations (e.g. log, square root, reciprocal) were applied to the data before analysis. In  
370 each dataset, the cut-off value for the Cook's distance was set at  $4/n$  (where  $n$  was the number of  
371 observations in a certain dataset), and all values with a Cook's distance greater than  $4/n$  were  
372 considered as outliers and disregarded. Provided that the residuals were not normally distributed, bias-  
373 corrected accelerated bootstrap analyses were run with a sample size of  $10^5$  and two different seeds  
374 (i.e. 2000 and 200), using a Mersenne Twister random number generator algorithm. The 95%  
375 confidence intervals generated by bootstrap analyses showed seed sensitivity at the decimal digit.

## 376 Results

### 377 The cytoplasm was glassy at 9% and 33% RH and fluid at 64% and 85% RH, whereas storage 378 lipids always remained fluid during CD at 45 °C.

379 The physical properties of *P. densiflora* seeds at the moisture conditions used in all CD regimes  
380 were assessed combining information from DMA, DSC, and water sorption isotherms. In the DMA  
381 scans,  $\alpha$  relaxations denoted the temperature at which the amorphous solid structure of seed  
382 cytoplasm (i.e. the glass) melted into a fluid system, which is indicative of the Tg. Similar to the Tg,  $\alpha$   
383 relaxation in non-aged control seeds shifted towards lower temperatures as the seed WC increased  
384 (Fig. 1A). Notably, the temperature and size of the  $\alpha$  relaxations measured by DMA, or the Tgs detected  
385 as second order transitions by DSC, were not significantly affected by the CD regimes (data not shown).  
386 The DMA scans also revealed two further structural relaxations below the water freezing point. These  
387 structural relaxations were not affected by seed WC and were attributable to melting events of the  
388 FAs of seed storage lipids, particularly TAGs. The highest and sharpest peak (named L1 instead of  $\beta$   
389 relaxation to avoid confusion with the  $\beta$  relaxations occurring within the aqueous matrix) appeared  
390 between  $\sim -100$  and  $-80$  °C, followed by a second less prominent and broader one (L2), extending from  
391  $\sim -80$  °C to  $\sim -20$  °C (Fig. 1A). The presence of lipid peaks in the endosperm was consistent with a high  
392 seed oil content of  $29.7 \pm 1.2\%$  (w/w) on a fresh weight (FW) basis, quantified with TD-NMR and also  
393 revealed by DSC. Furthermore, DSC analyses targeting the hydrophobic domain of seed endosperm  
394 clearly detected melting peaks of storage lipids in the same temperature range of L1 and L2  
395 (Supplementary Fig. S1), confirming the lipid nature of these two relaxations.

396 Based on DMA and DSC analyses, in seeds aged at 45 °C the transition from glassy to fluid  
397 cytoplasm started at a seed WC of  $0.05 \text{ g H}_2\text{O g}^{-1} \text{ DW}$ , reaching a peak at  $0.06 \text{ g H}_2\text{O g}^{-1} \text{ DW}$ , which  
398 corresponded to RHs of 42 and 50%, respectively, as per the water sorption isotherms (Fig. 1B).

399 Therefore, the aqueous phase of the cytoplasm of seeds treated at 9 and 33% RH (corresponding to  
400 0.027 and 0.042 g H<sub>2</sub>O g<sup>-1</sup> DW, respectively) was in a glassy state with restricted molecular mobility  
401 (Fig. 1B). In contrast, seeds exposed to CD at 64 and 85% RH (corresponding to 0.069 and 0.098 g H<sub>2</sub>O  
402 g<sup>-1</sup> DW, respectively) had WCs above the T<sub>g</sub> and were aged with a fluid cytoplasm and higher molecular  
403 mobility (Fig. 1B). Water sorption isotherms at 45 °C enabled to calculate the BET monolayer, which  
404 corresponded to a seed WC of 0.033 g H<sub>2</sub>O g<sup>-1</sup> DW or 18% RH (Fig. 1B). Knowledge of the BET monolayer  
405 value contributed to further characterise the glassy state, indicating that during CD at 9% RH not all  
406 water binding sites of the surface of macromolecules were saturated (i.e. the BET monolayer was not  
407 complete, as from the BET adsorption model). However, during CD at 33% RH, all water binding sites  
408 of macromolecules became occupied by water molecules, forming a complete BET monolayer.  
409 Furthermore, DMA and DSC analyses showed that the seed storage lipids remained fluid during all the  
410 diverse CD regimes at 45 °C (Fig. 1B). Finally, the physical properties of non-aged control seeds  
411 suggested that seed bank seeds with a WC of 0.06 ± 0.01 g H<sub>2</sub>O g<sup>-1</sup> DW (determined after lyophilisation)  
412 were in the glassy state during storage at 4 and -20 °C. Based on the cooling and heating DSC scans  
413 (Supplementary Fig. S1; cooling scans not shown), seed storage lipids seeds were crystallised during  
414 storage at -20 °C, fluid during storage at 4 °C, and completely thawed when seeds had germinated at  
415 20 °C.

#### 416 **Hypoxia prevented loss of viability only when seeds were aged in the glassy state**

417 In control seeds before CD, total germination was 90%, and seeds required about 12 days to  
418 reach the T<sub>25</sub>, here used as an indicator of germination rate. After CD under normoxia, seed viability  
419 was significantly impaired, as indicated by lower total germination, longer T<sub>25</sub>, and enhanced  
420 electrolyte leakage during initial imbibition. The response to O<sub>2</sub> concentrations differed depending on  
421 the seed physical state (Fig. 2). Overall, seeds exposed to CD died faster at higher RHs (Fig. 2;  
422 Supplementary Figs. S2, S3; Supplementary Table S1). At low RH (i.e. in the glassy state), CD resulted  
423 in significantly decreased seed viability more under normoxia than hypoxia. For instance, after 138  
424 days of CD at 9% RH, seeds aged under normoxia did not germinate, whereas seeds under hypoxia  
425 retained total germination and germination rate (~12 d) comparable to the non-aged control (*P*-value  
426 > 0.05; Fig. 2A, B, Supplementary Fig. S2). Similarly, after 70 days of CD at 33% RH, ageing under hypoxia  
427 resulted in 2.3-fold higher total germination and faster germination rate compared to normoxia (Fig.  
428 2A, B). The deleterious effects of O<sub>2</sub> on the viability of glassy-state seeds were also revealed by  
429 significantly increased electrolyte leakage from seeds aged under normoxia, which was about 3- and  
430 2-fold higher at 9 and 33% RH, respectively, compared to seeds aged under hypoxia (Fig. 2C). In  
431 contrast, during CD seeds with fluid cytoplasm (i.e. at 64 and 85% RH) reached comparable total

432 germination under both normoxia and hypoxia (on average 66%), had similar germination rates (16-17  
433 d), and electrolyte leakage did not significantly differ (Fig. 2, Supplementary Fig. S3).

434 Notably, seeds aged at 9% RH under normoxia died faster than predicted using the regression  
435 obtained from P50 values at higher RHs (Supplementary Fig. S2; Supplementary Table 1). Finally, long-  
436 term cold storage of seed bank seeds resulted in significantly lower total germination (78%,  $P$ -value <  
437 0.01) compared to initial viability after harvest (91%; data not shown), and the electrolyte leakage from  
438 seed bank seeds was about twice than from control seeds (Fig. 2C).

### 439 **GSH concentrations declined during ageing and independently of O<sub>2</sub> in seeds with a fluid** 440 **cytoplasm**

441 The water-soluble antioxidant GSH was the most abundant LMW thiol (cf. Fig. 3A and  
442 Supplementary Fig. S4), and CD led to a conversion of GSH to GSSG (Fig. 3A). In the glassy state (i.e. CD  
443 at 9 and 33% RH), normoxia led to a > 50% drop in GSH concentrations, whereas under hypoxia GSH  
444 declined by only 12%. This agreed with seeds accumulating 1.3 to 1.5-fold more GSSG under normoxia  
445 than hypoxia at 9 and 33% RH, respectively ( $P$ -values = 0.004 and 0.001; Fig. 3A). Ageing seeds with  
446 fluid cytoplasm (i.e. CD at 64 and 85% RH) led to an 80% drop in GSH concentrations, and at 85% RH  
447 under normoxia significantly more GSH was consumed and GSSG accumulated than under hypoxia ( $P$ -  
448 values < 0.001 and 0.004, respectively; Fig. 3A). Consequently, the oxidative shift in  $E_{\text{GSSG}/2\text{GSH}}$  was larger  
449 in seeds aged under normoxia than under hypoxia after CD at 9, 33, and 85% RH (Fig. 3B). Of note, GSH  
450 decreases prevailed over GSSG accumulation in seeds with fluid cytoplasm during CD, leading to > 40%  
451 loss of total glutathione (i.e. GSH + GSSG) when calculated as GSH equivalents (GSSG = 2 GSH). Seed  
452 WC was used to estimate the molar concentrations of GSH and GSSG, and GSH is a squared term in the  
453 Nernst equation to calculate  $E_{\text{GSSG}/2\text{GSH}}$  (equation 2). Therefore, seeds with different WCs, but with the  
454 same GSH and GSSG molar concentrations, will have different  $E_{\text{GSSG}/2\text{GSH}}$  values on a DW basis (note  
455 differences between the open circles in Fig. 3B, indicating respective  $E_{\text{GSSG}/2\text{GSH}}$  values of seeds at each  
456 WC in equilibrium with chosen RHs before CD). At 9% RH, seed WC was just 0.4% FW, and after CD a  
457 net increase in GSH molar concentrations occurred relative to control seeds (WC = 3.9% FW), despite  
458 GSH consumption on a DW basis (Fig. 3A). Conversely, at 85% RH a higher seed WC of 7.9% FW diluted  
459 GSH, resulting in  $E_{\text{GSSG}/2\text{GSH}}$  less negative values (i.e. more oxidising conditions; Fig. 3B). Nonetheless,  
460 GSSG accumulation and mainly GSH consumption were major factors contributing to the oxidative shift  
461 of  $E_{\text{GSSG}/2\text{GSH}}$  in seeds aged with fluid cytoplasm (Fig. 3B). In seed bank seeds, GSH concentrations  
462 dropped by 42% in comparison to control seeds, leading to less negative values of  $E_{\text{GSSG}/2\text{GSH}}$  (Fig. 3A,  
463 B).

464 The Nernst equation to calculate  $E_{\text{GSSG}/2\text{GSH}}$  is also dependent on cellular pH values (equation  
465 2). All CD treatments, except for 9% RH under hypoxia, resulted in a significant cellular acidification



466 (Fig. 3C), consequently contributing to more oxidising conditions (a difference in pH of 0.1 influences  
467 the  $E_{GSSG/2GSH}$  by 6 mV). In general, seed cellular acidification reflected the changes in total germination,  
468 whereby loss of seed viability was accompanied by lower pH (Figs 1A, 3C). The pH of seeds aged with  
469 a glassy cytoplasm decreased only marginally under hypoxia, whereas seeds aged with a fluid  
470 cytoplasm showed a slight but significant acidification regardless of  $O_2$  concentrations during CD (Fig.  
471 3C). Other LMW thiols included Cys,  $\gamma$ -Glu-Cys, and Cys-Gly. The GSH intermediates total Cys (i.e. Cys  
472 + cystine) and total  $\gamma$ -Glu-Cys (i.e.  $\gamma$ -Glu-Cys and bis- $\gamma$ -glutamyl-cystine) were always more abundant  
473 than total Cys-Gly (i.e. Cys-Gly + cystinyl-bis-glycine) (Supplementary Fig. S4). Notably, in the fluid state  
474 at 64 and 85% RH, seeds contained on average more total  $\gamma$ -Glu-Cys (2.8-fold) and total Cys (1.9-fold)  
475 than the control (Supplementary Fig. S4).

### 476 **Unsaturated fatty acids depleted in glassy-state seeds aged under normoxia**

477 DSC analyses enabled to quantify the effects of CD on physical changes of seed storage lipids  
478 (mainly TAGs). Melting of seed TAGs was detected as first order peaks in the DSC heating scans  
479 (Supplementary Fig. S1). In non-aged control seeds two distinct melting peaks occurred at  $-96 \pm 2$  °C  
480 (L1) and  $-40 \pm 2$  °C (L2), with a total  $\Delta H$  of lipid melt of  $17.9 \pm 5.8$  MJ  $g^{-1}$  DW (Fig. 4A). Seeds deteriorated  
481 at various RHs under normoxia and hypoxia also displayed lipid melting peaks between -100 and -70  
482 °C (L1) and between -50 and -5 °C (L2; Supplementary Fig. S1). The onset and peak temperatures of  
483 the melting transitions associated to both lipid peaks were not significantly affected by the CD regimes  
484 (Supplementary Fig. S1). However, the  $\Delta H$  of lipid melt was altered by the CD regimes, and significant  
485 changes were detected only in seeds aged under normoxia in the glassy state (Fig. 4A), whereby the  
486 total  $\Delta H$  of lipid melt significantly dropped by 3- and 1.5-fold in seeds aged at 9 and 33% RH,  
487 respectively (Fig. 4A), and mostly related to peak L1 (Supplementary Fig. S1).

488 To assess if such alterations of seed storage lipids' physical state were accompanied by chemical  
489 changes, the total content of each FA (i.e. constituting membranes and TAG of oil bodies) were  
490 measured with GC-MS. The most abundant FAs of *P. densiflora* seeds included linolenic ( $C_{18:3}$ ), palmitic  
491 ( $C_{16:0}$ ), linoleic ( $C_{18:2}$ ), oleic ( $C_{18:1}$ ), stearic ( $C_{18:0}$ ), and dihomo- $\gamma$ -linolenic acid ( $C_{20:3}$ ) (Supplementary Fig.  
492 S1). Depletion of FAs with unsaturated carbon bonds, and particularly polyunsaturated fatty acids  
493 (PUFAs), occurred in seeds aged under normoxia with a glassy cytoplasm, with hypoxia attenuating  
494 these drops (Fig. 4B). In contrast, saturated FAs were much less affected. Notably, no significant  
495 changes in any detected FAs occurred in seeds aged with a fluid cytoplasm (Fig. 4B). Seed bank seeds  
496 contained less palmitoleic ( $C_{16:1}$ ), oleic ( $C_{18:1}$ ), and linolenic ( $C_{18:3}$ ) acid than control seeds before CD  
497 (Fig. 4B).

498 **Glassy-state seeds aged under normoxia underwent tocopherols consumption and**  
499 **substantial increases of reactive electrophile species and aldehydes**

500 *P. densiflora* seeds contained about 30-fold more  $\gamma$ -tocopherol than  $\alpha$ -tocopherol (Fig. 5). In  
501 seeds aged in the glassy state under normoxia,  $\gamma$ -tocopherol concentrations decreased by 8.0 and 2.0-  
502 fold at 9 and 33% RH, respectively, and these losses were alleviated under hypoxia. In contrast,  $\gamma$ -  
503 tocopherol concentrations did not show pronounced changes after CD in seeds aged with fluid  
504 cytoplasm (64 and 85% RH). Additionally,  $\gamma$ -tocopherol concentrations were lower in seed bank seeds  
505 compared to control seeds. The much less abundant  $\alpha$ -tocopherol was depleted under normoxia at 9%  
506 RH, at a seed WC below the BET monolayer value (Fig. 5).

507 Relative to the non-aged control, seeds aged by CD in the glassy state (9 and 33% RH) under  
508 normoxia contained more aldehydes, RES, and (di)carboxylic acids (Fig. 6), in agreement with the loss  
509 of PUFAs (Fig. 4B). Such increases included > 250-fold more hexanal and azelaic acid, > 50-fold more  
510 azelaaldehydic and suberic acids, and > ten-fold more of the RES 4-hydroxynonenal and  
511 malondialdehyde. Conversely, seed storage under hypoxia at the same RHs prevented such increments  
512 (Fig. 6). Hexanal was by far the most abundant aldehyde detected in aged seeds, either after storage  
513 in response to CD or seed bank conditions (Supplementary Fig. S5). Ageing seeds with a fluid cytoplasm  
514 resulted in concentrations of acrolein, 4-hydroxyhexenal, trans-2-hexenal, and benzaldehyde falling 2-  
515 fold below their concentrations in non-aged control, while the accumulation of aldehydes was modest  
516 (Figure 6; Supplementary Fig. S5). Notably, these changes were only loosely coupled to O<sub>2</sub> availability  
517 (Fig. 6; Supplementary Fig. S5). Finally, seed bank seeds contained more 4-hydroxynonenal, acrolein,  
518 and butyraldehyde than control seeds (Fig. 6; Supplementary Fig. S5).

## 519 Discussion

520 Oxygen is directly involved in deteriorative reactions of macromolecules (McDonald, 1999;  
521 Bailly, 2004; Kranner *et al.*, 2010; Sano *et al.*, 2016), but its underlying effect on seed longevity has  
522 never been integrated with knowledge on structural mechanics and thermodynamics of seed  
523 deterioration. In this paper, we combined biophysical and biochemical analyses of *P. densiflora* seeds  
524 to clarify how contrasting physical states within seeds influence the contribution of O<sub>2</sub> to reactions  
525 accompanying ageing.

### 526 The physical state of the cytoplasm determine molecular mobility and affect seed ageing 527 reactions

528 Seed WC and storage temperature, together with genetic background, hormonal regulation, and  
529 environmental conditions experienced during seed development, maturation, and desiccation, all  
530 influence orthodox seed longevity (Buitink and Leprince, 2004; Nagel *et al.*, 2015; Leprince *et al.*, 2017;  
531 Zinmeister *et al.*, 2020). While genetic background and environmental conditions during seed  
532 development establish the biochemical composition of seed cells, seed WC and storage temperature  
533 determine the physical state of the cytoplasmic domains, which vary depending on the "dry  
534 architecture" of seed cells (Ballesteros *et al.*, 2020). This is critical to the longevity of desiccated seeds,  
535 because the physical state of aqueous and lipid domains define the physiological events and the rates  
536 of physicochemical reactions contributing to seed deterioration (Vertucci and Roos, 1990; Hoekstra *et al.*,  
537 2001; Ballesteros *et al.*, 2020). Across all CD regimes used in this study, DSC analyses revealed that  
538 *P. densiflora* seeds always maintained a liquid lipid domain (e.g. lipid droplets of storage TAGs).  
539 However, the seed aqueous domain was in the glassy state when aged by CD at 9 and 33% and became  
540 fluid when aged by CD at 64 and 85% RH, as determined by DMA (Fig. 1). Under all CD regimes, the  
541 fluid state of the lipid domain would have enabled molecular mobility of the main FA chains and their  
542 side groups. However, the activity of cytosolic lipid-metabolising enzymes (e.g. lipases and  
543 lipoxygenases that catalyse lipid hydrolysis and oxidation, respectively) would be restricted by the  
544 glassy state. In such a highly viscous conditions, molecular mobility is limited to vibration, bending, and  
545 rotation of the side groups of macromolecules (Ballesteros and Walters, 2011; Ballesteros *et al.*, 2020),  
546 which is not sufficient to permit enzymatic catalysis (Fernández-Marín *et al.*, 2013; Candotto Carniel *et al.*,  
547 2021) but allows diffusion of small molecules, such as O<sub>2</sub> (reviewed in Ballesteros *et al.*, 2020). In  
548 contrast, the molecular mobility of the aqueous matrix of the cytoplasm increased in the fluid state,  
549 ensuring the movement of the main chains of macromolecules, which is compatible with enzyme  
550 activity (Ballesteros and Walters, 2011). Particularly, enzymes were able to diffuse across the fluid  
551 cytoplasm, thus affecting the type of biochemical reactions that lead to seed ageing (Walters, 1998).

552           Altogether, due to the increased molecular mobility, possibly resuming enzymatic activity in  
553 the cytoplasm, seed ageing in the fluid state was accelerated compared to the glassy state (Fig. 2,  
554 Supplementary Fig. S3).

### 555 **O<sub>2</sub> is detrimental to the longevity of seeds with a glassy but not fluid cytoplasm**

556           Several studies have shown a detrimental effect of O<sub>2</sub> on seed longevity (e.g. (Harrison, 1966;  
557 Bennici *et al.*, 1984; Shrestha *et al.*, 1985; Barzali *et al.*, 2005; González-Benito *et al.*, 2011; Groot *et*  
558 *al.*, 2012; Groot *et al.*, 2015; Schwember and Bradford, 2011)), in line with a role for ROS in  
559 deterioration, as proposed by the "free-radical theory of ageing" (Harman, 1956). However, other  
560 studies reported that longevity of seeds aged by CD with a fluid cytoplasm was not influenced by  
561 elevated O<sub>2</sub> (Ohlrogge and Kernan, 1982; Ellis and Hong, 2007; Morscher *et al.*, 2015; Roach *et al.*,  
562 2018a; Schausberger *et al.*, 2019). Here, seeds in the fluid state aged rapidly irrespectively of O<sub>2</sub>  
563 availability (Figs. 1B, 2). (Ibrahim and Roberts, 1983) showed that O<sub>2</sub> impaired lettuce seed longevity  
564 only at WC < 0.18 g H<sub>2</sub>O g<sup>-1</sup> DW, suggesting that seed WC is a relevant determinant of how O<sub>2</sub> affects  
565 longevity. Altogether, these reports indirectly draw attention to differential ageing mechanisms tied  
566 to seed physical state. Particularly, in most of the fore-mentioned studies, in which O<sub>2</sub> impaired  
567 longevity, seeds were likely aged in the glassy state, as estimated according to available temperatures,  
568 WCs, and RHs. Our study on *P. densiflora* provides direct evidence that normoxia severely shortened  
569 seed longevity only when seeds were in the glassy state (Figs. 1, 2).

570           Based on a negative logarithmic relationship between seed WC (corresponding to RHs between  
571 30 and 100%) and P50 values under normoxia at 45 °C, a P50 of 248 days for seeds aged at 9% RH was  
572 estimated (Supplementary Fig. S2). As such, complete loss of germination of these seeds after only 138  
573 days is indicative of the so-called "critical moisture content" (corresponding with WCs in equilibrium  
574 with 10-15% RH at 20 °C), beyond which further decreases in seed WC do not extend longevity (Ellis  
575 *et al.*, 1990; Ellis *et al.*, 1992; Ellis and Hong, 2006). Nonetheless, seeds aged under hypoxia at 9% RH  
576 hardly showed any signs of deterioration after 138 d (Fig. 2). Albeit we have insufficient ageing intervals  
577 to calculate P50 values under hypoxia, it would take considerably longer to reach the P50 value of  
578 glassy-state seeds aged under normoxia at 9% RH. Considering that normoxia did not speed up ageing  
579 rates in the fluid state, but that longevity was extended in the glassy state, the negative logarithmic  
580 relationship between P50 values and seed WCs would most likely no longer fit under hypoxia, as it did  
581 under normoxia (Fig. 2, Supplementary Fig. S2). In a few studies, dehydration below the "critical  
582 moisture content" led to more rapid loss of viability than seeds stored with higher WC (Ellis *et al.*, 1988,  
583 1989; Vertucci *et al.*, 1994). This phenomenon has been related to the removal of the water that is  
584 tightly associated with macromolecular surfaces, such as that the BET monolayer on the surface of  
585 cytoplasmic macromolecules and lipid droplets (Labuza, 1980; Buitink *et al.*, 1998; Ballesteros and

586 Walters, 2007b; Barden and Decker, 2016), which is the physical situation occurring in seeds aged at  
587 9% RH in the present study (Fig. 1B). In seeds dried below the critical moisture content no water is  
588 strongly bound to macromolecules, and O<sub>2</sub> could attack empty water-binding sites of macromolecules,  
589 such as oleosins at the surface of lipid droplets and polar residues of lipid bilayers. Oleosins are  
590 essential to stabilise the oil bodies of dry seeds during seed imbibition (Leprince *et al.*, 1998) and seem  
591 to participate to lipid droplet breakdown by recruiting lipases and other hydrolytic enzymes involved  
592 in storage lipid metabolism during germination and early seedling growth (Chapman *et al.*, 2012).  
593 Regardless, the high sensitivity to O<sub>2</sub> of seeds aged at 33% RH (with a complete BET monolayer) in  
594 terms of viability loss, electrolyte leakage, and lipid peroxidation, suggests that the Tg is already a clear  
595 WC threshold below which seeds become susceptible to O<sub>2</sub>-mediated deterioration.

### 596 **Glutathione conversions and redox state reveal that O<sub>2</sub> diffusion and ROS production are** 597 **not totally restricted in the glassy state**

598 To understand the influence of O<sub>2</sub> on the redox state of the aqueous cytoplasmic domain under  
599 contrasting physical states during seed ageing, we focused on the hydrophilic antioxidant GSH. Dry  
600 seeds contain much more GSSG than healthy and hydrated plant tissues, and GSH conversion to GSSG  
601 is promoted during seed desiccation and ageing (Meyer *et al.*, 2007; Colville and Kranner, 2010). Large  
602 oxidative shifts of the cellular redox environment, as viewed through  $E_{\text{GSSG}/2\text{GSH}}$ , have been closely  
603 related to loss of seed viability (Kranner *et al.*, 2006; Kranner *et al.*, 2010; Roach *et al.*, 2010; Birtić *et*  
604 *al.*, 2011; Chen *et al.*, 2013; Morscher *et al.*, 2015; Nagel *et al.*, 2015; Roach *et al.*, 2018a; Nagel *et al.*,  
605 2019;; Schausberger *et al.*, 2019). However, in these studies seeds were likely aged at WCs above their  
606 Tg (i.e. with fluid cytoplasm). In *P. densiflora*, seed ageing was accompanied by shifts of  $E_{\text{GSSG}/2\text{GSH}}$   
607 towards more oxidising cellular conditions, due to GSH depletion and GSSG accumulation (Figs. 2, 3A,  
608 B). Notably, hypoxia helped maintain more reducing cellular conditions compared to normoxia (Fig.  
609 3B), indicating that O<sub>2</sub> promoted ROS production also during seed ageing in the glassy state. Therefore,  
610 the redox conversion of GSH to GSSG and some non-enzymatic ROS scavenging by GSH were enabled  
611 within the highly viscous glassy cytoplasm.

612 Under normoxia, seeds aged at the lowest WC (0.004 g H<sub>2</sub>O g<sup>-1</sup> DW, 9% RH) completely lost  
613 viability, despite their reduced cellular redox state ( $E_{\text{GSSG}/2\text{GSH}} = -195$  mV; Fig. 3B). This value is more  
614 negative than the -180 to -160 mV range associated with a 50% loss of viability measured at higher  
615 seed WCs at 60% RH and 50 °C (Kranner *et al.*, 2006). Reduced cellular redox states have also been  
616 found in unviable oil-rich seeds of *Vernonia galamensis* after ageing by CD in the glassy state, which  
617 contrasted to the more oxidised cellular redox states of seeds from the same species aged with fluid  
618 cytoplasm (Seal *et al.*, 2010a; Seal *et al.*, 2010b). The authors concluded that in this species  $E_{\text{GSSG}/2\text{GSH}}$   
619 was less closely associated with viability after ageing by CD near or within the glassy state, agreeing

620 with the results shown in the present study. Under dry/cold conditions of seed banks, seeds are  
621 typically in a glassy state, and the  $E_{GSSG/2GSH}$  values of barley seeds closely correlate to their viability  
622 after 15 years of seed bank-ageing (Nagel *et al.*, 2015; Roach *et al.*, 2018a). Similarly, *P. densiflora* seed  
623 bank seeds stored at low temperatures had only lost 13% of their viability, but their GSH  
624 concentrations were comparable to those detected in seeds aged by CD to complete viability loss  
625 under normoxia at 9% RH (Fig. 3A). Therefore, in glassy-state seeds temperature seems to influence  
626  $O_2$ -dependent deteriorative processes, which have down-stream consequences on GSH consumption.  
627 Indeed, during viability loss in the glassy state, seed bank seeds aged at low temperatures consumed  
628 more GSH than faster ageing seeds exposed to the higher temperature used for CD (Fig. 3A). However,  
629 it is important to consider that even if limited GSH consumption occurred while seeds were still  
630 desiccated, upon imbibition GSH concentrations may decrease following the GSTs-catalysed reactions  
631 with the abundantly produced RES (Fig. 6).

632 In summary, during seed ageing GSH consumption and redox conversion to GSSG were  
633 enhanced when the cytoplasm was fluid rather than glassy. However, these processes were not  
634 entirely restricted by the glassy state.

### 635 **A role for lipid peroxidation in the loss of viability of seeds with a glassy cytoplasm**

636 Structural damage to cell membranes compromise solute compartmentalisation, leading to  
637 uncontrolled solute leakage and affecting cell functions (Powell and Matthews, 1981; Matthews and  
638 Powell, 2006). Normoxia in the glassy state resulted in cellular acidification (Fig. 3C), influencing the  
639  $E_{GSSG/2GSH}$  values (Schafer and Buettner, 2001). In bread wheat, seed deterioration in the glassy state  
640 was accompanied by increases in the proton concentrations of seed extracts, explained as an effect of  
641 oxidative damage to the cell membranes (Nagel *et al.*, 2019). Interestingly, *P. densiflora* seeds aged in  
642 the glassy state under normoxia leaked more electrolytes than seeds aged at the same RH under  
643 hypoxia (Fig. 3C), thus pointing to  $O_2$ -mediated structural damage of cell membranes, likely implicated  
644 in the accelerated loss of viability.

645 Lipid peroxidation has been related to deterioration, particularly in oily seeds (Harman and  
646 Mattick, 1976; Pearce and Abdelsamad, 1980; Stewart and Bewley, 1980; McDonald, 1999; Tammela  
647 *et al.*, 2005; Walters *et al.*, 2005b; Oenel *et al.*, 2017). However, also in starchy seeds of barley and  
648 wheat, oxidation and hydrolysis of TAGs and other lipids during ageing in the glassy state have been  
649 correlated with viability loss (Riewe *et al.*, 2017; Wiebach *et al.*, 2020). Furthermore, a decrease in the  
650 energy of lipid melting transitions, indicative of structural changes to the lipid phase, has been  
651 documented in aged seeds (Vertucci, 1992; Porteous *et al.*, 2019). This phenomenon was also evident  
652 in CD-aged *P. densiflora* seeds under normoxia, but only after ageing in the glassy state (Fig. 4A) and  
653 can be explained by the depletion of unsaturated FAs, especially PUFAs (Fig. 4), which are more prone

654 to peroxidation than unsaturated and monounsaturated FAs (Priestley and Leopold, 1983; McDonald,  
655 1999; Smirnov, 2010). The lipid melting peak L2 revealed by the DSC heating scans appeared at melting  
656 temperatures typical of the  $\beta'$  crystals of linoleic (-25 °C) and linolenic (-35 °C) acids (Small, 1986;  
657 Knothe and Dunn, 2009), which were among the most abundant PUFAs of *P. densiflora* seeds (Fig. 1A,  
658 Supplementary Fig. S1) and have been found in other seeds and fern spores (Walters *et al.*, 2005b;  
659 Ballesteros and Walters, 2007a;). However, the  $\Delta H$  of lipid melt of peak L2 did not change after CD (Fig.  
660 4A, Supplementary Fig. S1). In contrast, another lipid melting peak (L1) appeared at about -90 °C and  
661 sharply flattened in the DSC scans of seeds aged at 9% RH under normoxia (Supplementary Fig. S1).  
662 Depending on the cooling conditions, FAs can crystallise into different polymorphic types with the  
663 same chemical composition, but increasing order, density, and stability and decreasing energy and  
664 volume. These polymorphisms are generally denoted by the letters  $\alpha$ ,  $\beta'$ , and  $\beta$ , being  $\alpha$  the first and  
665 least stable arrangement assumed by crystallising lipids (Metin and Hartel, 2005). The lipid melting  
666 peak L1 does not correspond to the melting temperature of  $\beta'$  crystals of any tabulated TAG (Small,  
667 1986; Knothe and Dunn, 2009), but likely resulted from the melting transition of  $\alpha$  crystals of linoleic  
668 and linolenic acids, as observed in other seeds (Vertucci, 1992; Walters *et al.*, 2005b). Therefore, it  
669 seems that peroxidation in the glassy state was mostly directed towards  $\alpha$  crystals of linoleic and  
670 linolenic acids, contributing to peak L1 smoothing.

671 In the lipid domain of the cytoplasm, tocopherols are the most abundant antioxidants  
672 essential to protect cells from lipid peroxidation and critical for seed quality (Menè-Saffranè *et al.*,  
673 2010). Recently, seed longevity has been associated with a high proportion of  $\gamma$ -tocopherol in the total  
674 vitamin E pool of several rice cultivars (Lee *et al.*, 2020). Furthermore, seeds of tocopherol-  
675 deficient mutants accumulate oxidised lipids and lipid-peroxide-derived RES, which lead to faster  
676 ageing (Sattler *et al.*, 2004; Sattler *et al.*, 2006; Menè-Saffranè *et al.*, 2010). The presence of O<sub>2</sub> during  
677 ageing of *P. densiflora* seeds in the glassy state resulted in a consumption of  $\alpha$ - and  $\gamma$ -tocopherols (Fig.  
678 5). This biochemical change in the lipid domain ties to increased electrolyte leakage during seed  
679 imbibition, changes in FA profiles, and drops in the  $\Delta H$  of lipid melt (Figs 1C, 4), suggesting that O<sub>2</sub> in  
680 the storage environment led to lipid peroxidation in seeds aged in the glassy state.

681 To ascertain the occurrence of lipid peroxidation, we measured peroxidation-associated  
682 products, including aldehydes and RES (Pamplona, 2011; Mano *et al.*, 2019). The release of volatile  
683 aldehydes (e.g. hexanal) is a precocious symptom of lipid peroxidation during seed ageing in the glassy  
684 (WC < 0.05 g H<sub>2</sub>O g<sup>-1</sup> DW) (Tammela *et al.*, 2003; Mira *et al.*, 2010), but not in the fluid state (Mira *et al.*,  
685 2016). Hexanal was a dominant aldehyde produced by *P. densiflora* seeds aged in the glassy state  
686 under normoxia (Fig. 6; Supplementary Fig. S4). Among the more reactive RES, 4-hydroxynonenal  
687 increased the most in response to CD of seeds with a glassy cytoplasm (Supplementary Fig. S5). Both  
688 these carbonyls are derived from  $\omega$ -6 PUFAs, such as linoleic acid, whose contents significantly

689 decreased in such seeds (Fig. 4B). Furthermore, PUFA-derived aldehydes can non-enzymatically  
690 convert to short-chain dicarboxylic acids (Passi *et al.*, 1993). Indeed, azelaic acid, considered as a  
691 marker of lipid peroxidation in plants (Zoeller *et al.*, 2012), increased 500-fold in seeds aged under  
692 normoxia at 9% RH compared to the control (Fig. 6). The C<sub>6</sub> aldehydes (e.g. hexanal) can also be  
693 produced via lipid metabolism, involving lipoxygenase and hydroperoxide lyase during germination,  
694 but apparently not before imbibition (Weichert *et al.*, 2002), supporting a non-enzymatic route of  
695 peroxidation-associated products' formation during seed ageing in the glassy state. Therefore, the  
696 remarkably high concentrations of RES, aldehydes, and dicarboxylic acids detected under normoxia,  
697 confirmed that lipid peroxidation during ageing was strongly enhanced by O<sub>2</sub> in glassy-state *P.*  
698 *densiflora* seeds (Fig. 6, Supplementary Fig. S4).

699 In summary, O<sub>2</sub>-mediated damage in the glassy state was characterised by deterioration of the  
700 seed lipid domain, the most mobile cytoplasmic domain in the glassy state. Loss of unsaturated FAs,  
701 enhanced production of RES and carbonyls, and consumption of tocopherols are all "hall-marks" of the  
702 O<sub>2</sub>-mediated autocatalytic cascade of lipid peroxidation (Fig. 7).

### 703 **Antioxidant metabolism resumes in rapidly-ageing seeds with fluid cytoplasm**

704 In contrast to *P. densiflora* seeds aged by CD in the glassy state, the longevity of those seeds  
705 aged by CD with fluid cytoplasm (i.e. at 64 and 85% RH) was not extended by hypoxia, and no significant  
706 signs of lipid peroxidation were detected (Figs. 2, 4B). This agrees with the release of volatiles by seeds  
707 aged with fluid cytoplasm, as reported in previous studies, which also pointed to oxygen-independent  
708 glycolytic and fermentations reactions (Mira *et al.*, 2010; Colville *et al.*, 2012). Previous analyses on  
709 sunflower, barley, and broccoli suggest that elevated O<sub>2</sub> concentrations are not detrimental to the  
710 longevity of seeds aged by CD with fluid cytoplasm (Morscher *et al.*, 2015; Roach *et al.*, 2018a;  
711 Schausberger *et al.*, 2019). However, in these studies the modulation of O<sub>2</sub> during CD affects the  
712 concentrations of LMW antioxidants. For instance, various tocopherols increase in response to CD,  
713 but differently depending upon O<sub>2</sub> availability (Roach *et al.*, 2018a). This result aligns to the finding  
714 that enzyme activity, which reinforces antioxidant defences, is possible in the "rubbery" (fluid) state,  
715 but not in the glassy state (Fernández-Marín *et al.*, 2013; Candotto Carniel *et al.*, 2021). Whereas the  
716 majority of steps in tocopherol synthesis occurs within the lipid phase of the cytoplasm, precursors  
717 (e.g. tyrosine), intermediates, and substrates for the pathways (e.g. ATP) are located in the aqueous  
718 domain and necessitate sufficient molecular mobility to be accessible to enzymes (Menè-Saffranè and  
719 DellaPenna, 2010; Muñoz and Munné-Bosch, 2019). Conversely, *de novo* GSH biosynthesis takes place  
720 entirely in the aqueous domain and requires two ATP-dependent reactions, the first of which is the  
721 rate limiting step and generates  $\gamma$ -Glu-Cys at the expense of ATP (Noctor *et al.*, 2012). Therefore,  
722 increases in  $\gamma$ -Glu-Cys concentrations in *P. densiflora* seeds aged at 64% and 85% RH could indicate



723 GSH anabolism (Supplementary Fig. S3). Alternatively, other enzymes (e.g. carboxypeptidases) could  
724 account for the release of  $\gamma$ -Glu-Cys during GSH catabolism (Noctor *et al.*, 2012). The ligase that  
725 catalyses  $\gamma$ -Glu-Cys formation (EC 6.3.2.2) is regulated by GSH and Cys concentrations via non-allosteric  
726 feedback competitive inhibition with glutamate (Yang *et al.*, 2019). Consequently, the depletion of GSH  
727 could have stimulated GSH *de novo* synthesis, as part of protective antioxidant mechanisms. In fact,  
728 redox homeostasis ensured by GSH availability also prevents RES from being highly toxic molecules  
729 (Farmer and Mueller, 2013).

730 One route that could lead to GSH depletion, rather than GSSG accumulation, relies on GST-  
731 mediated conjugation to RES. Some RES, such as acrolein, have profound impact on GSH  
732 concentrations (Mano, 2012; Roach *et al.*, 2018b), and in the present study the concentrations of RES  
733 decreased in seeds aged with fluid cytoplasm (Fig. 6), conditions in which GSH concentrations dropped  
734 most (Fig. 3A).

735 In summary, our data suggest that enzymatic activity can resume in seeds with a fluid cytoplasm,  
736 whereby damage to lipids appeared to be very marginal, differently from glassy-state seeds. Besides  
737 glycolysis and fermentation reactions, reported in previous studies, here we show that seeds in the  
738 fluid state also resumed a certain level of antioxidant metabolism (Fig. 7), which may include  $\gamma$ -Glu-Cys  
739 synthesis and GST activity, potentially to counteract rapid ageing rates.

#### 740 **Ageing by CD in the glassy state best simulates biochemical changes during cold seed storage**

741 After storage at WC of  $\sim 0.06 \text{ g H}_2\text{O g}^{-1} \text{ DW}$  for 20 years at temperatures between +4 and -20 °C,  
742 *P. densiflora* seeds contained less GSH and  $\gamma$ -tocopherol and showed signs of lipid peroxidation, such  
743 as elevated concentrations of hexanal and 4-hydroxynonenal, less unsaturated FAs, and more  
744 pronounced electrolyte leakage in comparison with non-aged control seeds (Figs. 2-6, Supplementary  
745 Fig. S4). We cannot exclude that environmental conditions of the different harvest years contributed  
746 to some biochemical differences between seed bank seeds (1999) and seeds used for CD (2015).  
747 Nonetheless, this comparison revealed biochemical changes under low storage temperatures  
748 consistent with changes induced by CD when conducted in the glassy but not in the fluid state.

#### 749 **Implications for seed longevity prediction and germplasm storage**

750 The differential mechanisms of seed ageing found between seeds in the glassy and the fluid  
751 state contribute to the debate about the use of CD or accelerated ageing methods in seed science  
752 research, but also highlight the potential benefits of hypoxic dry seed storage in seed banks to extend  
753 longevity. Equations that include temperature, RH, species-specific ageing constants, and initial seed  
754 viability have been derived for estimating seed ageing rates, but as yet they do not include the  
755 influence of  $\text{O}_2$  concentration (Ellis and Roberts, 1980; Pritchard and Dickie, 2003; Ellis and Hong, 2007).

756 This would be highly relevant considering that in seed banks, germplasm is typically stored in the glassy  
757 state and, in some cases, is ageing faster than expected (Li and Pritchard, 2009). Therefore, our results  
758 have three main implications for seed banking management. Firstly, for studying seed longevity, CD  
759 better reflects ageing mechanisms under the dry/cold conditions of a seed bank when seeds are  
760 treated in the glassy rather than fluid state. Secondly, as O<sub>2</sub> promoted seed ageing reactions during CD  
761 below the T<sub>g</sub>, limiting seed exposure to O<sub>2</sub> during long-term cold storage, as also recommended by  
762 other authors (Groot *et al.*, 2015; Nagel *et al.*, 2016; Buijs *et al.*, 2020) would most likely prolong  
763 germplasm longevity. Finally, equations to predict seed longevity under cold, dry, and hypoxic  
764 conditions require new viability constants to be calculated.

## 765 **Supplementary data**

766 Supplementary data are available at *JBX online*.

767 *Table S1*. Conditions used for controlled deterioration (CD) of *Pinus densiflora* seeds under normoxia  
768 and hypoxia.

769 *Fig. S1*. Effects of relative humidity (RH) on the influence of O<sub>2</sub> during controlled deterioration (CD) at  
770 45 °C on the melting properties of seed storage lipids, measured with differential scanning calorimetry  
771 (DSC).

772 *Fig. S2*. Seed longevity after controlled deterioration (CD) at 45 °C under normoxia (i.e. 19.6% O<sub>2</sub>) and  
773 RH ranging from 30% to 100%, corresponding to indicated seed water contents (WCs) determined after  
774 lyophilisation.

775 *Fig. S3*. Effects of relative humidity (RH) on the influence of O<sub>2</sub> during controlled deterioration (CD) at  
776 45 °C on seed germination.

777 *Fig. S4*. Effects of relative humidity (RH) on the influence of O<sub>2</sub> during controlled deterioration (CD) at  
778 45 °C on total concentrations of low-molecular-weight thiol/disulphide redox couples.

779 *Fig. S5*. Effects of relative humidity (RH) on the influence of O<sub>2</sub> during controlled deterioration (CD) at  
780 45 °C on absolute concentrations of reactive electrophile species and aldehydes.

## 781 **Acknowledgments**

782 The authors thank Birgit Knoll and Bettina Lehr (University of Innsbruck) for excellent technical  
783 assistance with oxygen and electrical conductivity measurements and HPLC analyses.

784 Funding by the Ministry of the Republic of South Korea to CSN are gratefully acknowledged (NRF-  
785 2017R1D1A1B03034615). The BritInn Fellowship Program (Academic Network Britain Innsbruck,  
786 University of Innsbruck) supported DG with a research travel grant to the Royal Botanic Gardens, Kew.  
787 The Royal Botanic Gardens, Kew, receive grant-in-aid from DEFRA.

## 788 **Author contributions**

789 Conceptualisation: TR, DG, DB; formal analysis: DG, DB, WS, EA, TR; funding acquisition: TR, CSN, DG;  
790 investigation: DG, TR, DB, CES, CSN; methodology: DG, TR, DB, WS, EA, CES; project administration: TR;  
791 resources: CSN, CES, IK; supervision: TR, DB, CES; validation: DG, TR, DB, WS, EA, CES; visualisation: DG,  
792 TR, DB; writing - original draft: DG, TR, DB; writing - review & editing: TR, DG, DB, WS, EA, CES, IK. All  
793 authors read and approved the final version of the manuscript.

## 794 **Data availability statement**

795 The data supporting the findings of this study are available from the corresponding author, TR, upon  
796 request.

## References

- Bahin E, Bailly C, Sotta B, Kranner I, Corbineau F, Leymarie J.** 2011. Crosstalk between reactive oxygen species and hormonal signalling pathways regulates grain dormancy in barley. *Plant Cell and Environment* **34**, 980-993.
- Bailly C.** 2004. Active oxygen species and antioxidants in seed biology. *Seed Science Research* **14**, 93-107.
- Bailly C.** 2019. The signalling role of ROS in the regulation of seed germination and dormancy. *Biochemical Journal* **476**, 3019-3032.
- Bailly C, Kranner I.** 2011. *Analyses of reactive oxygen species and antioxidants in relation to seed longevity and germination*. Berlin: Springer, 343-367.
- Ballesteros D, Pritchard HW, Walters C.** 2020. Dry architecture: towards the understanding of the variation of longevity in desiccation-tolerant germplasm. *Seed Science Research*.
- Ballesteros D, Walters C.** 2007a. Calorimetric properties of water and triacylglycerols in fern spores relating to storage at cryogenic temperatures. *Cryobiology* **55**, 1-9.
- Ballesteros D, Walters C.** 2007b. Water properties in fern spores: sorption characteristics relating to water affinity, glassy states, and storage stability. *Journal of Experimental Botany* **58**, 1185-1196.
- Ballesteros D, Walters C.** 2011. Detailed characterization of mechanical properties and molecular mobility within dry seed glasses: relevance to the physiology of dry biological systems. *Plant Journal* **68**, 607-619.
- Ballesteros D, Walters C.** 2019. Solid-state biology and seed longevity: a mechanical analysis of glasses in pea and soybean embryonic axes. *Frontiers in Plant Science* **10**.
- Barden L, Decker EA.** 2016. Lipid oxidation in low-moisture food: a review. *Critical Reviews in Food Science and Nutrition* **56**, 2467-2482.
- Barzali M, Lohwasser U, Niedzielski M, Börner A.** 2005. Effects of different temperatures and atmospheres on seed and seedling traits in a long-term storage experiment on rye (*Secale cereale* L.). *Seed Science and Technology* **33**, 713-721.
- Bazin J, Batlla D, Dussert S, El-Maarouf-Bouteau H, Bailly C.** 2011. Role of relative humidity, temperature, and water status in dormancy alleviation of sunflower seeds during dry after-ripening. *Journal of Experimental Botany* **62**, 627-640.
- Bennici A, Bitonti MB, Floris C, Gennai D, Innocenti AM.** 1984. Aging in *Triticum durum* wheat seeds: early storage in carbon-dioxide prolongs longevity. *Environmental and Experimental Botany* **24**, 159-165.
- Birtić S, Colville L, Pritchard HW, Pearce SR, Kranner I.** 2011. Mathematically combined half-cell reduction potentials of low-molecular-weight thiols as markers of seed ageing. *Free Radical Research* **45**, 1093-1102.
- Buijs G, Willems LAJ, Kodde J, Groot SPC, Bentsink L.** 2020. Evaluating the EPPO method for seed longevity analyses in *Arabidopsis*. *Plant Science* **301**.
- Buitink J, Leprince O.** 2008. Intracellular glasses and seed survival in the dry state. *Comptes Rendus Biologies* **331**, 788-795.
- Buitink J, Walters C, Hoekstra FA, Crane J.** 1998. Storage behavior of *Typha latifolia* pollen at low water contents: interpretation on the basis of water activity and glass concepts. *Physiologia Plantarum* **103**, 145-153.
- Candotto Carniel F, Fernández-Marín B, Arc E, Craighero T, Laza JM, Incerti G, Tretiach M, Kranner I.** 2021. How dry is dry? Molecular mobility in relation to thallus water content in a lichen. *Journal of Experimental Botany*. <https://doi.org/10.1093/jxb/eraa521>
- Castillo-Lorenzo E, Pritchard HW, Finch-Savage WE, Seal CE.** 2019. Comparison of seed and seedling functional traits in native *Helianthus* species and the crop *H. annuus* (sunflower). *Plant Biology* **21**, 533-543.
- Chapman KD, Dyer JM, Mullen RT.** 2012. Biogenesis and functions of lipid droplets in plants. *Journal of Lipid Research* **53**, 215-226.

- Chen HY, Osuna D, Colville L, Lorenzo O, Graeber K, Kuster H, Leubner-Metzger G, Kranner I.** 2013. Transcriptome-wide mapping of pea seed ageing reveals a pivotal role for genes related to oxidative stress and programmed cell death. *Plos One* **8**.
- Colville L, Bradley EL, Lloyd AS, Pritchard HW, Castle L, Kranner I.** 2012. Volatile fingerprints of seeds of four species indicate the involvement of alcoholic fermentation, lipid peroxidation, and Maillard reactions in seed deterioration during ageing and desiccation stress. *Journal of Experimental Botany* **63**, 6519-6530.
- Colville L, Kranner I.** 2010. Desiccation tolerant plants as model systems to study redox regulation of protein thiols. *Plant Growth Regulation* **62**, 241-255.
- Colville L, Pritchard HW.** 2019. Seed life span and food security. *New Phytologist* **224**, 557-562.
- Crane J, Miller AL, Van Roekel JW, Walters C.** 2003. Triacylglycerols determine the unusual storage physiology of *Cuphea* seed. *Planta* **217**, 699-708.
- Ellis RH, Hong TD.** 2006. Temperature sensitivity of the low-moisture-content limit to negative seed longevity-moisture content relationships in hermetic storage. *Annals of Botany* **97**, 785-791.
- Ellis RH, Hong TD.** 2007. Seed longevity - moisture content relationships in hermetic and open storage. *Seed Science and Technology* **35**, 423-431.
- Ellis RH, Hong TD, Roberts EH.** 1988. A low moisture content limit to logarithmic relations between seed moisture content and longevity. *Annals of Botany* **61**, 405-408.
- Ellis RH, Hong TD, Roberts EH.** 1989. A comparison of the low moisture content limit to the logarithmic relation between seed moisture and longevity in 12 species. *Annals of Botany* **63**, 601-611.
- Ellis RH, Hong TD, Roberts EH.** 1992. The low-moisture-content limit to the negative logarithmic relation between seed longevity and moisture content in 3 subspecies of rice. *Annals of Botany* **69**, 53-58.
- Ellis RH, Hong TD, Roberts EH, Tao K.** 1990. Low moisture-content limits to relations between seed Longevity and moisture. *Annals of Botany* **65**, 493-504.
- Ellis RH, Roberts EH.** 1980. Improved equations for the prediction of seed longevity. *Annals of Botany* **45**, 13-30.
- Farmer EE, Davoine C.** 2007. Reactive electrophile species. *Current Opinion in Plant Biology* **10**, 380-386.
- Farmer EE, Mueller MJ.** 2013. ROS-Mediated lipid peroxidation and RES-activated signaling. *Annual Review of Plant Biology* **64**, 429-450.
- Farooq M, Basra SMA, Ahmad N, Hafeez K.** 2005. Thermal hardening: a new seed vigor enhancement tool in rice. *Journal of Integrative Plant Biology* **47**, 187-193.
- Fernández-Marín B, Kranner I, Sebastián MS, Artetxe U, Laza JM, Vilas JL, Pritchard HW, Nadajaran J, Míguez F, Becerril JM, Garcia-Plazaola JI.** 2013. Evidence for the absence of enzymatic reactions in the glassy state. A case study of xanthophyll cycle pigments in the desiccation-tolerant moss *Syntrichia ruralis*. *Journal of Experimental Botany* **64**, 3033-3043.
- Fernández-Marín B, Míguez F, Méndez- Fernández L, Agut A, Becerril JM, Garcia-Plazaola JI, Kranner I, Colville L.** 2017. Seed carotenoid and tocochromanol composition of wild Fabaceae species is shaped by phylogeny and ecological factors. *Frontiers in Plant Science* **8**.
- Gerna D, Roach T, Arc E, Stöggel W, Limonta M, Vaccino P, Kranner I.** 2018. Redox poise and metabolite changes in bread wheat seeds are advanced by priming with hot steam. *Biochemical Journal* **475**, 3725-3743.
- Gerna D, Roach T, Stöggel W, Wagner J, Vaccino P, Limonta M, Kranner I.** 2017. Changes in low-molecular-weight thiol-disulphide redox couples are part of bread wheat seed germination and early seedling growth. *Free Radical Research* **51**, 568-581.
- González-Benito ME, Pérez-García F, Tejada G, Gómez-Campo C.** 2011. Effect of the gaseous environment and water content on seed viability of four Brassicaceae species after 36 years storage. *Seed Science and Technology* **39**, 443-451.
- Groot SPC, de Groot L, Kodde J, van Treuren R.** 2015. Prolonging the longevity of ex situ conserved seeds by storage under anoxia. *Plant Genetic Resources: Characterization and Utilization* **13**, 18-26.

- Groot SPC, Surki AA, de Vos RCH, Kodde J.** 2012. Seed storage at elevated partial pressure of oxygen, a fast method for analysing seed ageing under dry conditions. *Annals of Botany* **110**, 1149-1159.
- Harman D.** 1956. Aging: a theory based on free radical and radiation chemistry. *Journals of Gerontology* **11**, 298-300.
- Harman GE, Mattick LR.** 1976. Association of lipid oxidation with seed aging and death. *Nature* **260**, 323-324.
- Harrison BJ.** 1966. Seed deterioration in relation to storage conditions and its influence upon germination, chromosomal damage and plant performance. *Journal of the National Institute of Agricultural Botany* **10**, 644-663.
- Harrison BJ, McLeish J.** 1954. Abnormalities of stored seed. *Nature* **173**, 593-594.
- Hay FR, Adams J, Manger K, Probert R.** 2008. The use of non-saturated lithium chloride solutions for experimental control of seed water content. *Seed Science and Technology* **36**, 737-746.
- Hoekstra FA, Golovina EA, Buitink J.** 2001. Mechanisms of plant desiccation tolerance. *Trends in Plant Science* **6**, 431-438.
- Hourston JE, Perez M, Gawthrop F, Richards M, Steinbrecher T, Leubner-Metzger G.** 2020. The effects of high oxygen partial pressure on vegetable *Allium* seeds with a short shelf-life. *Planta* **251**.
- Hu RR, Liang J, Xie X, Zhang YJ, Zhang XY.** 2020. Incidence of pine needle blight and its relationship with site factors of Japanese red pine forests in the Kunyushan Mountains, East China. *Global Ecology and Conservation* **22**.
- Ibrahim AE, Roberts EH.** 1983. Viability of lettuce seeds. 1. Survival in hermetic storage. *Journal of Experimental Botany* **34**, 620-630.
- Knothe G, Dunn RO.** 2009. A comprehensive evaluation of the melting points of fatty acids and esters determined by differential scanning calorimetry. *Journal of the American Oil Chemists Society* **86**, 843-856.
- Kranner I, Birtić S, Anderson KM, Pritchard HW.** 2006. Glutathione half-cell reduction potential: a universal stress marker and modulator of programmed cell death? *Free Radical Biology and Medicine* **40**, 2155-2165.
- Kranner I, Minibayeva FV, Beckett RP, Seal CE.** 2010. What is stress? Concepts, definitions and applications in seed science. *New Phytologist* **188**, 655-673.
- Kumar SPJ, Prasad SR, Banerjee R, Thammineni C.** 2015. Seed birth to death: dual functions of reactive oxygen species in seed physiology. *Annals of Botany* **116**, 663-668.
- Labuza TP.** 1980. The effect of water activity on reaction kinetics of food deterioration. *Food Technology* **34**, 36-41.
- Lee JS, Kwak J, Hay FR.** 2020. Genetic markers associated with seed longevity and vitamin E in diverse Aus rice varieties. *Seed Science Research*.
- Lehner A, Mamadou N, Poels P, Côme D, Bailly C, Corbineau F.** 2008. Changes in soluble carbohydrates, lipid peroxidation and antioxidant enzyme activities in the embryo during ageing in wheat grains. *Journal of Cereal Science* **47**, 555-565.
- Leprince O, van Aelst AC, Pritchard HW, Murphy DJ.** 1998. Oleosins prevent oil-body coalescence during seed imbibition as suggested by a low-temperature scanning electron microscope study of desiccation-tolerant and -sensitive oilseeds. *Planta* **204**, 109-119.
- Li-Beisson YSBS, B; Beisson F; Andersson, MX; Arondel, V.** 2010. *Acyl-lipid metabolism*. Arabidopsis book. Rockville, MD: Last R, e0133.
- Li DZ, Pritchard HW.** 2009. The science and economics of ex situ plant conservation. *Trends in Plant Science* **14**, 614-621.
- López-Pozo M, Ballesteros D, Laza JM, García-Plazaola JI, Fernández-Marín B.** 2019. Desiccation tolerance in chlorophyllous fern spores: are ecophysiological features related to environmental conditions? *Frontiers in Plant Science* **10**.
- Mano J.** 2012. Reactive carbonyl species: Their production from lipid peroxides, action in environmental stress, and the detoxification mechanism. *Plant Physiology and Biochemistry* **59**, 90-97.
- Mano J, Biswas MS, Sugimoto K.** 2019. Reactive carbonyl species: a missing link in ROS signaling. *Plants* **8**.

- Matthews S, Powell AA.** 2006. Electrical conductivity vigour test: physiological basis and use. *Seed Science* **131**, 32-35.
- McDonald MB.** 1999. Seed deterioration: physiology, repair and assessment. *Seed Science and Technology* **27**, 177-237.
- Menè-Saffranè L, DellaPenna D.** 2010. Biosynthesis, regulation and functions of tocopherols in plants. *Plant Physiology and Biochemistry* **48**, 301-309.
- Menè-Saffranè L, Jones AD, DellaPenna D.** 2010. Plastochromanol-8 and tocopherols are essential lipid-soluble antioxidants during seed desiccation and quiescence in *Arabidopsis*. *Proceedings of the National Academy of Sciences of the United States of America* **107**, 17815-17820.
- Metin S, Hartel RW.** 2005. *Crystallization of fats and oils*. Nueva Jersey: John Wiley & Sons.
- Meyer AJ, Brach T, Marty L, Kreye S, Rouhier N, Jacquot JP, Hell R.** 2007. Redox-sensitive GFP in *Arabidopsis thaliana* is a quantitative biosensor for the redox potential of the cellular glutathione redox buffer. *Plant Journal* **52**, 973-986.
- Mira S, González-Benito ME, Hill LM, Walters C.** 2010. Characterization of volatile production during storage of lettuce (*Lactuca sativa*) seed. *Journal of Experimental Botany* **61**, 3915-3924.
- Mira S, Hill LM, González-Benito ME, Ibáñez MA, Walters C.** 2016. Volatile emission in dry seeds as a way to probe chemical reactions during initial asymptomatic deterioration. *Journal of Experimental Botany* **67**, 1783-1793.
- Morscher F, Kranner I, Arc E, Bailly C, Roach T.** 2015. Glutathione redox state, tocopherols, fatty acids, antioxidant enzymes and protein carbonylation in sunflower seed embryos associated with after-ripening and ageing. *Annals of Botany* **116**, 669-678.
- Munné-Bosch S, Alegre L.** 2002. The function of tocopherols and tocotrienols in plants. *Critical Reviews in Plant Sciences* **21**, 31-57.
- Muñoz P, Munné-Bosch S.** 2019. Vitamin E in plants: biosynthesis, transport, and function. *Trends in Plant Science* **24**, 1040-1051.
- Murthy UMN, Kumar PP, Sun WQ.** 2003. Mechanisms of seed ageing under different storage conditions for *Vigna radiata* (L.) Wilczek: lipid peroxidation, sugar hydrolysis, Maillard reactions and their relationship to glass state transition. *Journal of Experimental Botany* **54**, 1057-1067.
- Nagel M, Kodde J, Pistrick S, Mascher M, Börner A, Groot SPC.** 2016. Barley seed aging: genetics behind the dry elevated pressure of oxygen aging and moist controlled deterioration. *Frontiers in Plant Science* **7**.
- Nagel M, Kranner I, Neumann K, Rolletschek H, Seal CE, Colville L, Fernández-Marín B, Börner A.** 2015. Genome-wide association mapping and biochemical markers reveal that seed ageing and longevity are intricately affected by genetic background and developmental and environmental conditions in barley. *Plant Cell and Environment* **38**, 1011-1022.
- Nagel M, Seal CE, Colville L, Rodenstein A, Un S, Richter J, Pritchard HW, Börner A, Kranner I.** 2019. Wheat seed ageing viewed through the cellular redox environment and changes in pH. *Free Radical Research* **53**, 641-654.
- Noctor G, Mhamdi A, Chaouch S, Han Y, Neukermans J, Marquez-Garcia B, Queval G, Foyer CH.** 2012. Glutathione in plants: an integrated overview. *Plant Cell and Environment* **35**, 454-484.
- Oenel A, Fekete A, Krischke M, Faul SC, Gresser G, Havaux M, Mueller MJ, Berger S.** 2017. Enzymatic and non-enzymatic mechanisms contribute to lipid oxidation during seed aging. *Plant and Cell Physiology* **58**, 925-933.
- Ohlrogge JB, Kernan TP.** 1982. Oxygen-dependent aging of seeds. *Plant Physiology* **70**, 791-794.
- Oracz K, El-Maarouf-Bouteau H, Kranner I, Bogatek R, Corbineau F, Bailly C.** 2009. The mechanisms involved in seed dormancy alleviation by hydrogen cyanide unravel the role of reactive oxygen species as key factors of cellular signaling during germination. *Plant Physiology* **150**, 494-505.
- Pamplona R.** 2011. Advanced lipoxidation end-products. *Chemico-Biological Interactions* **192**, 14-20.
- Passi S, Picardo M, Deluca C, Nazzaroporro M, Rossi L, Rotilio G.** 1993. Saturated dicarboxylic acids as products of unsaturated fatty acid oxidation. *Biochimica Et Biophysica Acta* **1168**, 190-198.
- Pearce RS, Abdelsamad IM.** 1980. Change in fatty acid content of polar lipids during aging of seeds of peanut (*Arachis hypogea* L.). *Journal of Experimental Botany* **31**, 1283-1290.



- Porteous G, Nesbitt M, Kendon JP, Prychid CJ, Stuppy W, Conejero M, Ballesteros D.** 2019. Assessing extreme seed longevity: the value of historic botanical collections to modern research. *Frontiers in Plant Science* **10**.
- Powell AA, Matthews S.** 1981. Evaluation of controlled deterioration, a new vigor test for small seeded vegetables. *Seed Science and Technology* **9**, 633-640.
- Priestley DA, Leopold AC.** 1983. Lipid changes during natural aging of soybean seeds. *Physiologia Plantarum* **59**, 467-470.
- Pritchard HW, Dickie JB.** 2003. *Predicting seed Longevity: the use and abuse of seed viability equations*. Royal Botanic Gardens, Kew.
- Rajjou L, Debeaujon I.** 2008. Seed longevity: survival and maintenance of high germination ability of dry seeds. *Comptes Rendus Biologies* **331**, 796-805.
- Riewe D, Wiebach J, Altmann T.** 2017. Structure annotation and quantification of wheat seed oxidized lipids by high-resolution LC-MS/MS. *Plant Physiology* **175**, 600-618.
- Roach T, Baur T, Stöggel W, Krieger-Liszak A.** 2017. *Chlamydomonas reinhardtii* responding to high light: a role for 2-propenal (acrolein). *Physiologia Plantarum* **161**, 75-87.
- Roach T, Beckett RP, Minibayeva FV, Colville L, Whitaker C, Chen HY, Bailly C, Kranner I.** 2010. Extracellular superoxide production, viability and redox poise in response to desiccation in recalcitrant *Castanea sativa* seeds. *Plant Cell and Environment* **33**, 59-75.
- Roach T, Nagel M, Börner A, Eberle C, Kranner I.** 2018a. Changes in tocochromanols and glutathione reveal differences in the mechanisms of seed ageing under seedbank conditions and controlled deterioration in barley. *Environmental and Experimental Botany* **156**, 8-15.
- Roach T, Stöggel W, Baur T, Kranner I.** 2018b. Distress and eustress of reactive electrophiles and relevance to light stress acclimation via stimulation of thiol/disulphide-based redox defences. *Free Radical Biology and Medicine* **122**, 65-73.
- Roberts EH.** 1961. Viability of rice seed in relation to temperature, moisture content, and gaseous environment. *Annals of Botany* **25**, 381-390.
- Sano N, Rajjou L, North HM, Debeaujon I, Marion-Poll A, Seo M.** 2016. Staying alive: molecular aspects of seed longevity. *Plant and Cell Physiology* **57**, 660-674.
- Sattler SE, Gilliland LU, Magallanes-Lundback M, Pollard M, DellaPenna D.** 2004. Vitamin E is essential for seed longevity, and for preventing lipid peroxidation during germination. *Plant Cell* **16**, 1419-1432.
- Sattler SE, Mène-Saffrané L, Farmer EE, Krischke M, Mueller MJ, DellaPenna D.** 2006. Nonenzymatic lipid peroxidation reprograms gene expression and activates defense markers in Arabidopsis tocopherol-deficient mutants. *Plant Cell* **18**, 3706-3720.
- Schafer FQ, Buettner GR.** 2001. Redox environment of the cell as viewed through the redox state of the glutathione disulfide/glutathione couple. *Free Radical Biology and Medicine* **30**, 1191-1212.
- Schausberger C, Roach T, Stöggel W, Arc E, Finch-Savage WE, Kranner I.** 2019. Abscisic acid-determined seed vigour differences do not influence redox regulation during ageing. *Biochemical Journal* **476**, 965-974.
- Schwember AR, Bradford KJ.** 2011. Oxygen interacts with priming, moisture content and temperature to affect the longevity of lettuce and onion seeds. *Seed Science Research* **21**, 175-185.
- Seal CE, Zammit R, Scott P, Flowers TJ, Kranner I.** 2010a. Glutathione half-cell reduction potential and alpha-tocopherol as viability markers during the prolonged storage of *Suaeda maritima* seeds. *Seed Science Research* **20**, 47-53.
- Seal CE, Zammit R, Scott P, Nyamongo DO, Daws MI, Kranner I.** 2010b. Glutathione half-cell reduction potential as a seed viability marker of the potential oilseed crop *Vernonia galamensis*. *Industrial Crops and Products* **32**, 687-691.
- Shrestha KB, Shepherd KR, Turnbull JW.** 1985. Controlled-atmosphere storage for *Pinus radiata* seed. *Commonwealth Forestry Review* **64**, 141-150.
- Small DM.** 1986. *The physical chemistry of lipids: from alkanes to phospholipids*. New York: Plenum Press.
- Smirnoff N.** 2010. Tocochromanols: rancid lipids, seed longevity, and beyond. *Proceedings of the National Academy of Sciences of the United States of America* **107**, 17857-17858.

- Smirnoff N, Wheeler GL.** 2000. Ascorbic acid in plants: biosynthesis and function. *Critical Reviews in Plant Sciences* **19**, 267-290.
- Stewart RRC, Bewley JD.** 1980. Lipid peroxidation associated with accelerated aging of soybean axes. *Plant Physiology* **65**, 245-248.
- Sun WQ.** 1997. Glassy state and seed storage stability: the WLF kinetics of seed viability loss at T>T<sub>g</sub> and the plasticization effect of water on storage stability. *Annals of Botany* **79**, 291-297.
- Tammela P, Nygren M, Laakso I, Hopia A, Vuorela H, Hiltunen R.** 2003. Volatile compound analysis of ageing *Pinus sylvestris* L. (Scots pine) seeds. *Flavour and Fragrance Journal* **18**, 290-295.
- Tammela P, Salo-Väänänen P, Laakso I, Hopia A, Vuorela H, Nygren M.** 2005. Tocopherols, tocotrienols and fatty acids as indicators of natural ageing in *Pinus sylvestris* seeds. *Scandinavian Journal of Forest Research* **20**, 378-384.
- Tommasi F, Paciolla C, de Pinto MC, De Gara L.** 2001. A comparative study of glutathione and ascorbate metabolism during germination of *Pinus pinea* L. seeds. *Journal of Experimental Botany* **52**, 1647-1654.
- Vertucci CW.** 1992. A calorimetric study of the changes in lipids during seed storage under dry conditions. *Plant Physiology* **99**, 310-316.
- Vertucci CW, Roos EE.** 1990. Theoretical basis of protocols for seed storage. *Plant Physiology* **94**, 1019-1023.
- Vertucci CW, Roos EE, Crane J.** 1994. Theoretical basis of protocols for seed storage. III. Optimum moisture contents for pea seeds stored at different temperatures. *Annals of Botany* **74**, 531-540.
- Walters C.** 1998. Understanding the mechanisms and kinetics of seed aging. *Seed Science Research* **8**, 223-244.
- Walters C.** 2015. Orthodoxy, recalcitrance and in-between: describing variation in seed storage characteristics using threshold responses to water loss. *Planta* **242**, 397-406.
- Walters C, Ballesteros D, Vertucci VA.** 2010. Structural mechanics of seed deterioration: standing the test of time. *Plant Science* **179**, 565-573.
- Walters C, Hill LM, Wheeler LJ.** 2005a. Dying while dry: kinetics and mechanisms of deterioration in desiccated organisms. *Integrative and Comparative Biology* **45**, 751-758.
- Walters C, Landré P, Hill L, Corbineau F, Bailly C.** 2005b. Organization of lipid reserves in cotyledons of primed and aged sunflower seeds. *Planta* **222**, 397-407.
- Wardman P.** 1989. Reduction potentials of one-electron couples involving free radicals in aqueous solution. *Journal of Physical and Chemical Reference Data* **18**, 1637-1755.
- Washitani I, Saeki T.** 1986. Germination responses of *Pinus densiflora* seeds to temperature, light and interrupted imbibition. *Journal of Experimental Botany* **37**, 1376-1387.
- Weichert H, Kolbe A, Kraus A, Wasternack C, Feussner I.** 2002. Metabolic profiling of oxylipins in germinating cucumber seedlings lipooxygenase-dependent degradation of triacylglycerols and biosynthesis of volatile aldehydes. *Planta* **215**, 612-619.
- Whitehouse KJ, Hay FR, Lusty C.** 2020. Why seed physiology is important for genebanking. *Plants* **9**.
- Wiebach J, Nagel M, Börner A, Altmann T, Riewe D.** 2020. Age-dependent loss of seed viability is associated with increased lipid oxidation and hydrolysis. *Plant Cell and Environment* **43**, 303-314.
- Yang YX, Lenherr ED, Gromes R, Wang SS, Wirtz M, Hell R, Peskan-Berghöfer T, Scheffzek K, Rausch T.** 2019. Plant glutathione biosynthesis revisited: redox-mediated activation of glutamylcysteine ligase does not require homo-dimerization. *Biochemical Journal* **476**, 1191-1203.
- Zoeller M, Stingl N, Kruschke M, Fekete A, Waller F, Berger S, Mueller MJ.** 2012. Lipid profiling of the *Arabidopsis* hypersensitive response reveals specific lipid peroxidation and fragmentation processes: biogenesis of pimelic and azelaic acid. *Plant Physiology* **160**, 365-378.

## Figure legends

797 **Fig. 1. Physical state of *Pinus densiflora* seeds in relation to water content (WC) and temperature.**

798 (A) Representative dynamic mechanical analyses (DMA) scans of seeds before controlled deterioration  
799 at diverse WCs, expressed as g H<sub>2</sub>O per g dry weight (g g<sup>-1</sup> DW). Scans show the tan  $\delta$ , which is the  
800 coefficient between the loss modulus and the storage modulus and measures the damping function  
801 related to molecular mobility. Peaks in tan  $\delta$  are indicative of diverse types of structural relaxations.  
802 The glass transition temperature (T<sub>g</sub>) is characterised by the  $\alpha$  relaxation peak, which moves to lower  
803 temperatures as the sample WC increases. The melting of storage lipids is indicated by two peaks (L1  
804 and L2), which occur within the same temperature range independently of the sample WC. L1 and L2  
805 were further characterised by differential scanning calorimetry (DSC; refer to Supplementary Fig. S4).  
806 (B) Phase diagram constructed using DMA and DSC data. The terms "glassy" and "fluid" refer to the  
807 aqueous domain of the cytoplasm (measured by DMA), while L1 and L2 correspond to the melting  
808 peaks determined by DSC and define the range of WCs and temperature, at which the hydrophobic  
809 domain (i.e. seed storage lipids) showed physical changes. The T<sub>g</sub> is depicted by the area within the  
810 onset (closed circles) and the peak (open circles) of the  $\alpha$  relaxations measured by DMA. The diamond  
811 indicates the Brunauer-Emmet-Teller (BET) monolayer, calculated from water sorption isotherms of  
812 seeds equilibrated at 45 °C. White squares denote the seed WCs reached at 45 °C at the various relative  
813 humidities (RH; n  $\geq$  2 seeds for each WC).

814 **Fig. 2. Effects of relative humidity (RH) on the influence of O<sub>2</sub> during controlled deterioration (CD) at**

815 **45 °C on germination and electrolyte leakage.** *Pinus densiflora* seeds were aged under normoxia (N,  
816 black bars, 19.6% O<sub>2</sub>) and hypoxia (H, grey bars, 0.4% O<sub>2</sub>) at indicated RHs. (A) Total germination (TG)  
817 measured after 45 days. (B) Time to reach 25% TG. Data were calculated from the germination curves  
818 shown in Supplementary Fig. S2. (C) Electrical conductivity of seed leachates. Asterisks denote  
819 significant differences (\*, *P*-value < 0.05; \*\*, *P*-value < 0.01) after *t*-tests comparing seeds before CD  
820 (control, white bars) with seeds exposed to CD at four RHs under N or H. Hash symbols denote  
821 significant differences (#, *P*-value < 0.05; ##, *P*-value < 0.01) after *t*-tests between seeds aged under N  
822 and H at the same RH. Values of seeds stored for 20 years at ~0.06 g H<sub>2</sub>O g<sup>-1</sup> dry weight and low  
823 temperatures (seed bank, light grey bars) are also shown. Data are means (n = 4 replicates of 50 seeds  
824 each)  $\pm$  SE.

825 **Fig. 3. Effects of relative humidity (RH) on the influence of O<sub>2</sub> during controlled deterioration (CD) at**

826 **45 °C on glutathione concentrations and redox state, and pH of seed extracts.** *Pinus densiflora* seeds  
827 were aged under normoxia (N, black bars, 19.6% O<sub>2</sub>) and hypoxia (H, grey bars, 0.4% O<sub>2</sub>) at indicated

828 RHs. (A) Concentrations on a dry weight (DW) basis of the low-molecular-weight thiol glutathione (GSH,  
829 open bars) and its disulphide (GSSG, closed bars). (B) Half-cell reduction potential of the GSSG/2GSH  
830 redox couple ( $E_{\text{GSSG}/2\text{GSH}}$ ) calculated according to the Nernst equation at the pH values showed in panel  
831 (C) with an offset correction. Circles indicate the  $E_{\text{GSSG}/2\text{GSH}}$  values calculated using the seed water  
832 contents at the end of seed pre-equilibration at indicated RHs and prior to CD. (C) pH of extracts  
833 obtained from finely ground seed powder. Asterisks denote significant differences (\*,  $P$ -value < 0.05;  
834 \*\*,  $P$ -value < 0.01) after  $t$ -tests comparing seeds before CD (control, white bars and open circles) with  
835 seeds exposed to CD at four RHs under N or H. Hash symbols denote significant differences (#,  $P$ -value  
836 < 0.05; ##,  $P$ -value < 0.01) after  $t$ -tests between seeds aged under N and H at the same RH. Values of  
837 seeds stored for 20 years at  $\sim 0.06 \text{ g H}_2\text{O g}^{-1} \text{ DW}$  and low temperatures (seed bank, light grey bars) are  
838 also shown. Data are means ( $n = 4$  replicates of 50 seeds each)  $\pm$  SE.

839 **Fig. 4. Effects of relative humidity (RH) on the influence of  $\text{O}_2$  during controlled deterioration (CD) at**  
840 **45 °C on the enthalpy of melt of storage lipids and relative abundance of fatty acids.** *Pinus densiflora*  
841 seeds were aged under normoxia (N, black bars, 19.6%  $\text{O}_2$ ) and hypoxia (H, grey bars, 0.4%  $\text{O}_2$ ) at  
842 indicated RHs. (A) Enthalpy of melt of storage lipids calculated from heating scans acquired with  
843 differential scanning calorimetry on seed endosperm, after excising embryonic axes. Asterisks denote  
844 significant differences (\*,  $P$ -value < 0.05) after  $t$ -tests between the endosperms of non-aged seeds,  
845 used as control, and seeds exposed to CD. Data are means ( $n = 4$  seeds)  $\pm$  SE. (B) Fold-change in the  
846 abundance of individual fatty acids, as compared to the non-aged control, measured as fatty acid  
847 methyl esters with gas chromatography coupled to mass spectrometry. Differences on a  $\log_2$  scale are  
848 shown by the bottom key highlighting decreases (blue), accumulation (red), and absence of changes  
849 (white). Asterisks denote significant differences (\*,  $P$ -value < 0.05; \*\*,  $P$ -value < 0.01) from  $t$ -tests  
850 comparing seeds before CD (control) with seeds after exposure to CD at four RHs under N or H. Hash  
851 symbols denote significant differences (#,  $P$ -value < 0.05; ##,  $P$ -value < 0.01) after  $t$ -tests between  
852 seeds aged under N and H at the same RH. Values of seeds stored for 20 years at  $\sim 0.06 \text{ g H}_2\text{O g}^{-1} \text{ DW}$   
853 and low temperatures (seed bank, SB) are also shown. Data are means ( $n = 4$  replicates of 50 seeds  
854 each)  $\pm$  SE. Different letters (e.g. a and b) refer to fatty acid isomers (with the same number of carbons  
855 and double bonds). C14:0, myristic acid; C16:0, palmitic acid; C18:0, stearic acid; C20:0 arachidic acid;  
856 C22:0, behenic acid; C24:0, lignoceric acid; C16:1, palmitoleic acid; C18:1 oleic acid; C20:1, eicosenoic  
857 acid; C18:2, linoleic acid; C20:2, eicosadienoic acid; C18:3, linolenic acid; C20:3, dihomo- $\gamma$ -linolenic  
858 acid.

859 **Fig. 5. Effects of relative humidity (RH) on the influence of O<sub>2</sub> during controlled deterioration (CD) at**  
860 **45 °C on the concentrations of tocopherols.** *Pinus densiflora* seeds were aged under normoxia (N,  
861 black bars, 19.6% O<sub>2</sub>) and hypoxia (H, grey bars, 0.4% O<sub>2</sub>) at the indicated RHs. Concentrations on a dry  
862 weight (DW) basis of (A)  $\gamma$ -tocopherol, and (B)  $\alpha$ -tocopherol. Asterisks denote significant differences  
863 (\*, *P*-value < 0.05; \*\*, *P*-value < 0.01) from *t*-tests comparing seeds before CD (control) with seeds after  
864 exposure to CD at four RHs under N or H. Hash symbols denote significant differences (#, *P*-value <  
865 0.05; ##, *P*-value < 0.01) after *t*-tests between seeds aged under N and H at the same RH. Values of  
866 seeds stored for 20 years at  $\sim$ 0.06 g H<sub>2</sub>O g<sup>-1</sup> DW and low temperatures (seed bank, light grey bars) are  
867 also shown. Data are means (*n* = 4 replicates of 50 seeds each)  $\pm$  SE; n.d. = not detected.

868 **Fig. 6. Effects of relative humidity (RH) on the influence of O<sub>2</sub> during controlled deterioration (CD) at**  
869 **45 °C on relative amounts of fatty acid breakdown products.** *Pinus densiflora* seeds were aged under  
870 normoxia (N, 19.6% O<sub>2</sub>) and hypoxia (H, 0.4% O<sub>2</sub>) at indicated RHs. Fold-change in the abundance of  
871 aldehydes (measured via ultra-high performance liquid chromatography coupled to mass  
872 spectrometry [MS]) and (di)carboxylic acids (measured via gas chromatography coupled to MS) are  
873 shown on a log<sub>2</sub> scale via shading, with blue and red highlighting decline and accumulation, compared  
874 to the non-aged control, respectively, as indicated by the key. Pale shading and n.d. indicate no change  
875 and when a compound was not detected, respectively. Black boxes next to compound names signify  
876 reactive electrophile species (RES). Asterisks denote significant differences (\*, *P*-value < 0.05; \*\*, *P*-  
877 value < 0.01) from *t*-tests comparing individual species in seeds before CD with seeds after CD at four  
878 RHs under H or normoxia N. Values of seeds stored for 20 years with at  $\sim$ 0.06 g H<sub>2</sub>O g<sup>-1</sup> DW and low  
879 temperatures (seed bank, SB) are also shown. Data are means (*n* = 4 replicates of 50 seeds each)  $\pm$  SE.

880 **Fig. 7. Schematic overview of the physicochemical changes of *Pinus densiflora* seed cells occurring in**  
881 **response to relative humidity (RH) and to O<sub>2</sub> concentrations during controlled deterioration at 45 °C.**  
882 During drying, the cytoplasm shrinks, reducing the area occupied by the cytosol and forcing in close  
883 proximity diverse organelles [nucleus (N), vacuole (V), mitochondria (M), and dry matter (D), including  
884 protein storage bodies and starch granules, the endomembrane system, and liquid lipid bodies (L)].  
885 Cell walls and membranes are folded. Below a certain moisture content (< 0.05 g H<sub>2</sub>O g<sup>-1</sup> DW or 42%  
886 RH, as from water sorption isotherms), the seed cytoplasm and organelles solidify (see Fig. 1B), forming  
887 an amorphous glass. Therefore, most of the seed cytoplasm at 9 and 33% RH (left side) was glassy. In  
888 addition, at 9% RH, the first monolayer of water molecules adsorbed to the surface of the  
889 macromolecules (i.e the Brunauer-Emmet-Teller [BET] monolayer) was partially removed, exposing  
890 some of their areas previously covered by water. In the glassy state, cellular viscosity is high, and  
891 molecular mobility is restricted to vibration, bending, and rotation of the side groups of

892 macromolecules. In this physical state, O<sub>2</sub> promoted lipid peroxidation, depletion of tocopherols, and  
893 accumulation of aldehydes and reactive electrophile species (RES). Between 42 and 50% RH  
894 (corresponding to 0.05 to 0.06 g H<sub>2</sub>O g<sup>-1</sup> DW, see Fig. 1B), the cytoplasm changed from a glassy to a  
895 fluid state, which remains very viscous and is also known as "rubbery" state. This was the scenario for  
896 seeds aged at 64 and 85% RH (right side). In the fluid state, organelles tend to disperse due to the  
897 enlarged volume of the cytosol, and molecular mobility rises in comparison to the glass (i.e. the main  
898 chains of macromolecules are enabled to move). The biochemical changes indicated in blue were  
899 enhanced by O<sub>2</sub>, and those in red occurred independently of O<sub>2</sub> availability. GSH, glutathione; PUFAs,  
900 (poly)unsaturated fatty acids; E<sub>GSSG/2GSH</sub> half-cell reduction potential of the glutathione/glutathione  
901 disulphide redox couple. This figure is partly adapted from Ballesteros et al., 2020.  
902

903 **Figures**

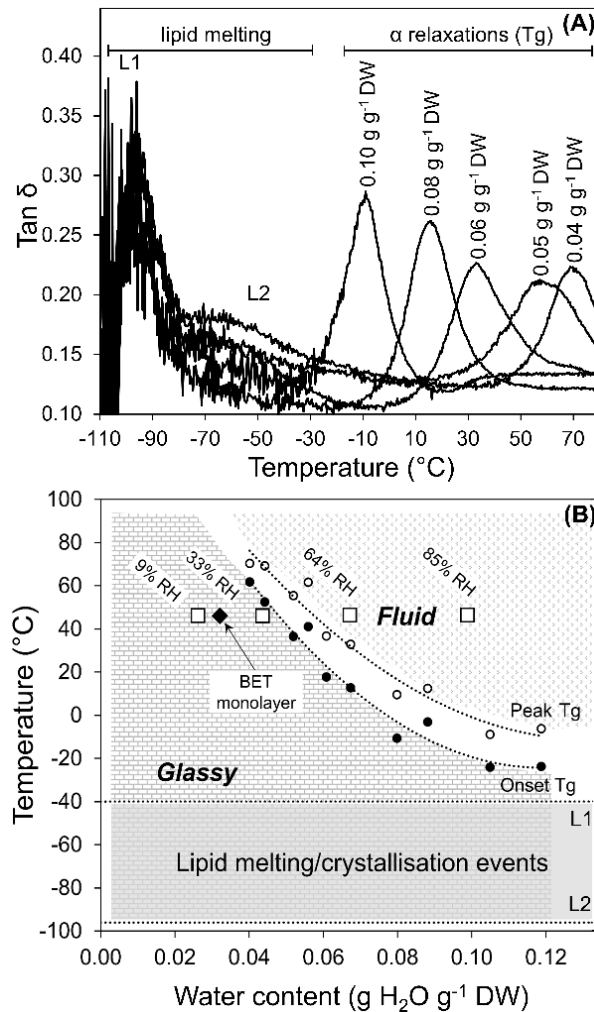

904 **Fig. 1. Physical state of *Pinus densiflora* seeds in relation to water content (WC) and temperature.**  
 905 (A) Representative dynamic mechanical analyses (DMA) scans of seeds before controlled deterioration  
 906 at diverse WCs, expressed as g H<sub>2</sub>O per g dry weight (g g<sup>-1</sup> DW). Scans show the tan δ, which is the  
 907 coefficient between the loss modulus and the storage modulus and measures the damping function  
 908 related to molecular mobility. Peaks in tan δ are indicative of diverse types of structural relaxations.  
 909 The glass transition temperature (T<sub>g</sub>) is characterised by the α relaxation peak, which moves to lower  
 910 temperatures as the sample WC increases. The melting of storage lipids is indicated by two peaks (L1  
 911 and L2), which occur within the same temperature range independently of the sample WC. L1 and L2  
 912 were further characterised by differential scanning calorimetry (DSC; refer to Supplementary Fig. S4).  
 913 (B) Phase diagram constructed using DMA and DSC data. The terms "glassy" and "fluid" refer to the  
 914 aqueous domain of the cytoplasm (measured by DMA), while L1 and L2 correspond to the melting  
 915 peaks determined by DSC and define the range of WCs and temperature, at which the hydrophobic  
 916 domain (i.e. seed storage lipids) showed physical changes. The T<sub>g</sub> is depicted by the area within the  
 917 onset (closed circles) and the peak (open circles) of the α relaxations measured by DMA. The diamond  
 918 indicates the Brunauer-Emmet-Teller (BET) monolayer, calculated from water sorption isotherms of  
 919 seeds equilibrated at 45 °C. White squares denote the seed WCs reached at 45 °C at the various relative  
 920 humidities (RH; n ≥ 2 seeds for each WC).

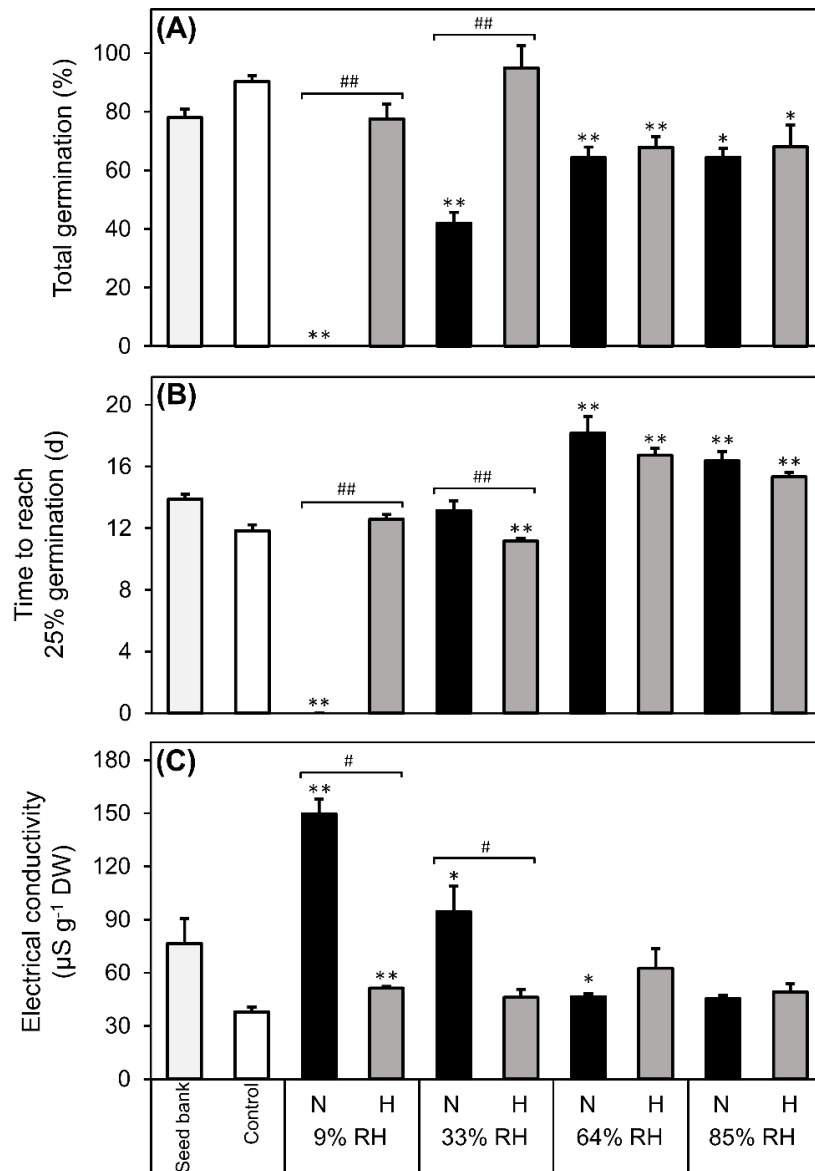

921 **Fig. 2. Effects of relative humidity (RH) on the influence of O<sub>2</sub> during controlled deterioration (CD) at**  
 922 **45 °C on germination and electrolyte leakage.** *Pinus densiflora* seeds were aged under normoxia (N,  
 923 black bars, 19.6% O<sub>2</sub>) and hypoxia (H, grey bars, 0.4% O<sub>2</sub>) at indicated RHs. (A) Total germination (TG)  
 924 measured after 45 days. (B) Time to reach 25% TG. Data were calculated from the germination curves  
 925 shown in Supplementary Fig. S2. (C) Electrical conductivity of seed leachates. Asterisks denote  
 926 significant differences (\*, *P*-value < 0.05; \*\*, *P*-value < 0.01) after *t*-tests comparing seeds before CD  
 927 (control, white bars) with seeds exposed to CD at four RHs under N or H. Hash symbols denote  
 928 significant differences (#, *P*-value < 0.05; ##, *P*-value < 0.01) after *t*-tests between seeds aged under N  
 929 and H at the same RH. Values of seeds stored for 20 years at ~0.06 g H<sub>2</sub>O g<sup>-1</sup> dry weight and low  
 930 temperatures (seed bank, light grey bars) are also shown. Data are means (*n* = 4 replicates of 50 seeds  
 931 each) ± SE.  
 932



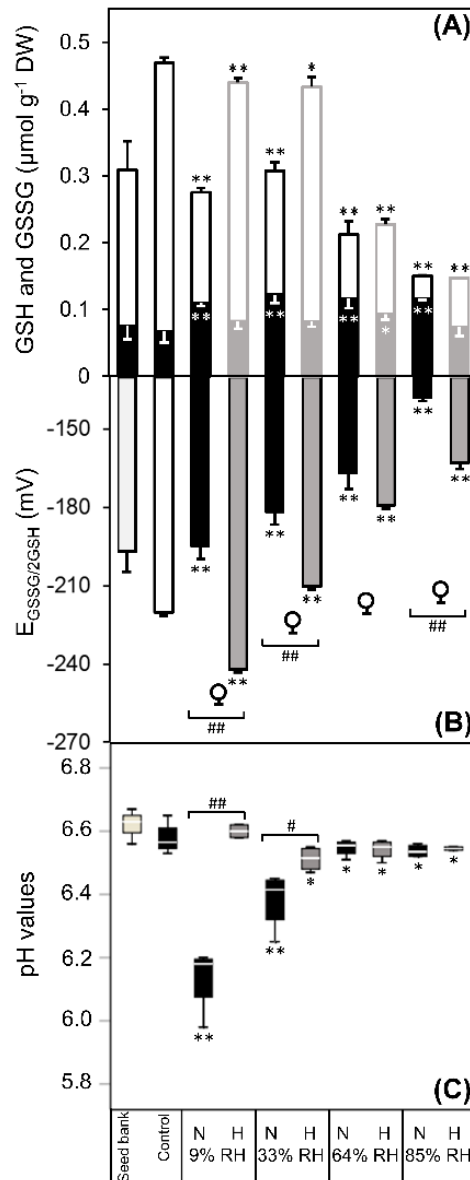

933 **Fig. 3. Effects of relative humidity (RH) on the influence of O<sub>2</sub> during controlled deterioration (CD) at**  
 934 **45 °C on glutathione concentrations and redox state, and pH of seed extracts.** *Pinus densiflora* seeds  
 935 were aged under normoxia (N, black bars, 19.6% O<sub>2</sub>) and hypoxia (H, grey bars, 0.4% O<sub>2</sub>) at indicated  
 936 RHs. (A) Concentrations on a dry weight (DW) basis of the low-molecular-weight thiol glutathione (GSH,  
 937 open bars) and its disulphide (GSSG, closed bars). (B) Half-cell reduction potential of the GSSG/2GSH  
 938 redox couple (E<sub>GSSG/2GSH</sub>) calculated according to the Nernst equation at the pH values showed in panel  
 939 (C) with an offset correction. Circles indicate the E<sub>GSSG/2GSH</sub> values calculated using the seed water  
 940 contents at the end of seed pre-equilibration at indicated RHs and prior to CD. (C) pH of extracts  
 941 obtained from finely ground seed powder. Asterisks denote significant differences (\*, P-value < 0.05;  
 942 \*\*, P-value < 0.01) after t-tests comparing seeds before CD (control, white bars and open circles) with  
 943 seeds exposed to CD at four RHs under N or H. Hash symbols denote significant differences (#, P-value  
 944 < 0.05; ##, P-value < 0.01) after t-tests between seeds aged under N and H at the same RH. Values of  
 945 seeds stored for 20 years at ~0.06 g H<sub>2</sub>O g<sup>-1</sup> DW and low temperatures (seed bank, light grey bars) are  
 946 also shown. Data are means (n = 4 replicates of 50 seeds each) ± SE.

947

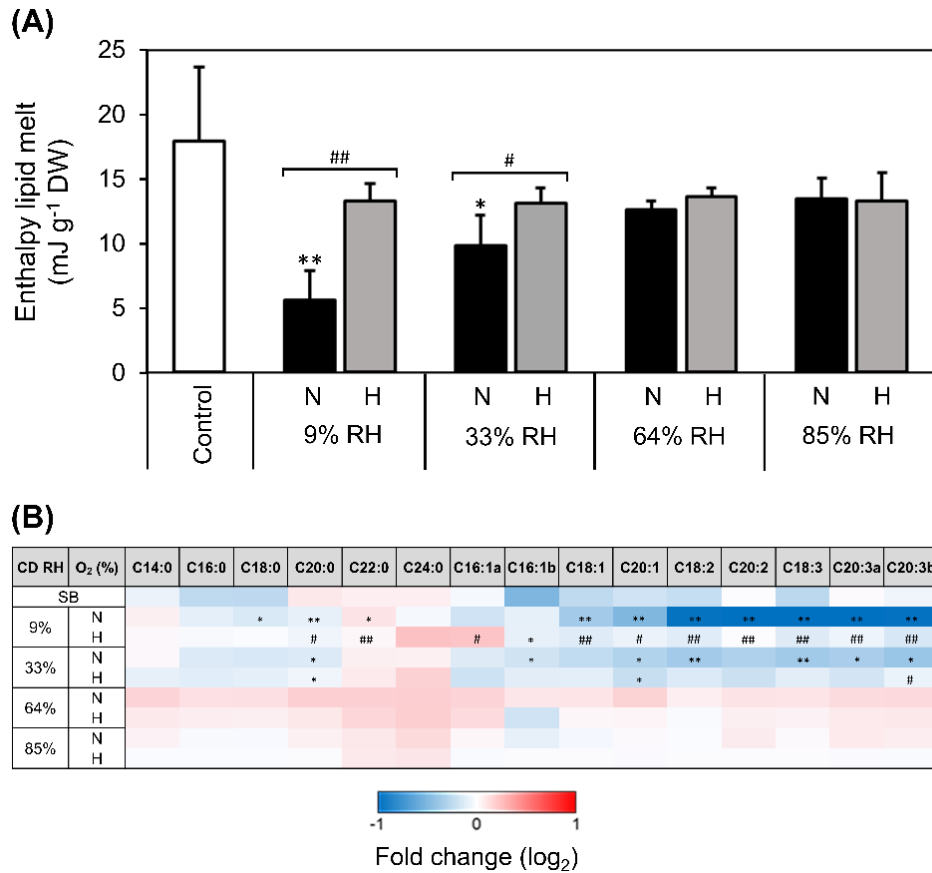

948 **Fig. 4. Effects of relative humidity (RH) on the influence of O<sub>2</sub> during controlled deterioration (CD) at**  
 949 **45 °C on the enthalpy of melt of storage lipids and relative abundance of fatty acids.** *Pinus densiflora*  
 950 seeds were aged under normoxia (N, black bars, 19.6% O<sub>2</sub>) and hypoxia (H, grey bars, 0.4% O<sub>2</sub>) at  
 951 indicated RHs. (A) Enthalpy of melt of storage lipids calculated from heating scans acquired with  
 952 differential scanning calorimetry on seed endosperm, after excising embryonic axes. Asterisks denote  
 953 significant differences (\*, *P*-value < 0.05) after *t*-tests between the endosperms of non-aged seeds,  
 954 used as control, and seeds exposed to CD. Data are means (*n* = 4 seeds) ± SE. (B) Fold-change in the  
 955 abundance of individual fatty acids, as compared to the non-aged control, measured as fatty acid  
 956 methyl esters with gas chromatography coupled to mass spectrometry. Differences on a log<sub>2</sub> scale are  
 957 shown by the bottom key highlighting decreases (blue), accumulation (red), and absence of changes  
 958 (white). Asterisks denote significant differences (\*, *P*-value < 0.05; \*\*, *P*-value < 0.01) from *t*-tests  
 959 comparing seeds before CD (control) with seeds after exposure to CD at four RHs under N or H. Hash  
 960 symbols denote significant differences (#, *P*-value < 0.05; ##, *P*-value < 0.01) after *t*-tests between  
 961 seeds aged under N and H at the same RH. Values of seeds stored for 20 years at ~0.06 g H<sub>2</sub>O g<sup>-1</sup> DW  
 962 and low temperatures (seed bank, SB) are also shown. Data are means (*n* = 4 replicates of 50 seeds  
 963 each) ± SE. Different letters (e.g. a and b) refer to fatty acid isomers (with the same number of carbons  
 964 and double bonds). C14:0, myristic acid; C16:0, palmitic acid; C18:0, stearic acid; C20:0 arachidic acid;  
 965 C22:0, behenic acid; C24:0, lignoceric acid; C16:1, palmitoleic acid; C18:1 oleic acid; C20:1, eicosenoic  
 966 acid; C18:2, linoleic acid; C20:2, eicosadienoic acid; C18:3, linolenic acid; C20:3, dihomo- $\gamma$ -linolenic  
 967 acid.

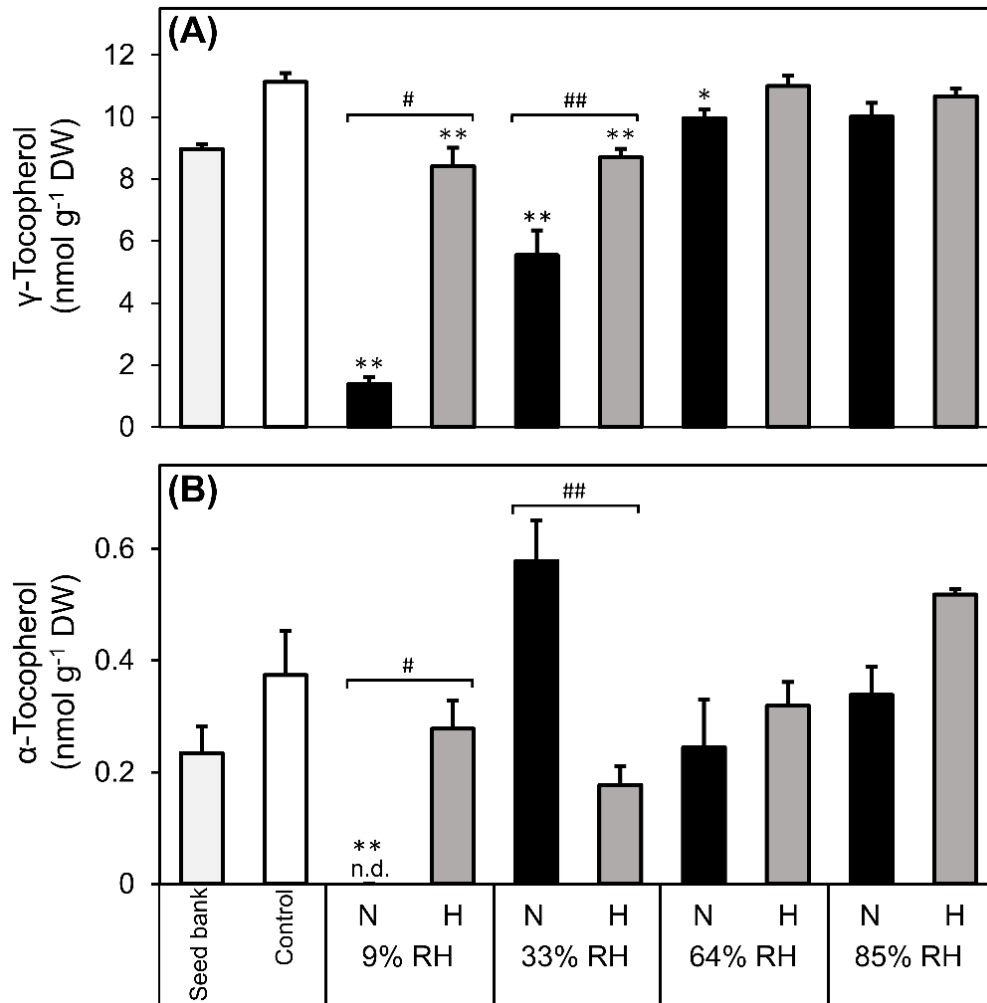

968 **Fig. 5. Effects of relative humidity (RH) on the influence of O<sub>2</sub> during controlled deterioration (CD) at**  
 969 **45 °C on the concentrations of tocopherols.** *Pinus densiflora* seeds were aged under normoxia (N,  
 970 19.6% O<sub>2</sub>) and hypoxia (H, grey bars, 0.4% O<sub>2</sub>) at the indicated RHs. Concentrations on a dry  
 971 weight (DW) basis of (A)  $\gamma$ -tocopherol, and (B)  $\alpha$ -tocopherol. Asterisks denote significant differences  
 972 (\*, *P*-value < 0.05; \*\*, *P*-value < 0.01) from *t*-tests comparing seeds before CD (control) with seeds after  
 973 exposure to CD at four RHs under N or H. Hash symbols denote significant differences (#, *P*-value <  
 974 0.05; ##, *P*-value < 0.01) after *t*-tests between seeds aged under N and H at the same RH. Values of  
 975 seeds stored for 20 years at ~0.06 g H<sub>2</sub>O g<sup>-1</sup> DW and low temperatures (seed bank, light grey bars) are  
 976 also shown. Data are means (*n* = 4 replicates of 50 seeds each)  $\pm$  SE; n.d. = not detected.

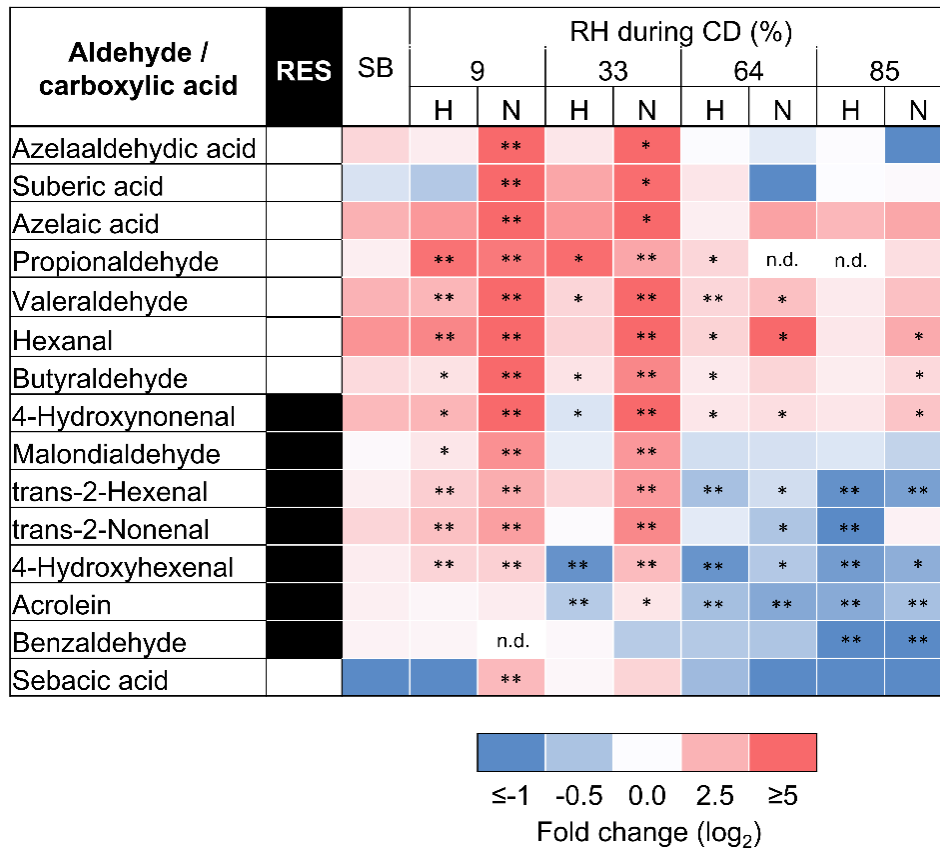

977 **Fig. 6. Effects of relative humidity (RH) on the influence of O<sub>2</sub> during controlled deterioration (CD) at**  
 978 **45 °C on relative amounts of fatty acid breakdown products.** *Pinus densiflora* seeds were aged under  
 979 normoxia (N, 19.6% O<sub>2</sub>) and hypoxia (H, 0.4% O<sub>2</sub>) at indicated RHs. Fold-change in the abundance of  
 980 aldehydes (measured via ultra-high performance liquid chromatography coupled to mass  
 981 spectrometry [MS]) and (di)carboxylic acids (measured via gas chromatography coupled to MS) are  
 982 shown on a log<sub>2</sub> scale via shading, with blue and red highlighting decline and accumulation,  
 983 compared to the non-aged control, respectively, as indicated by the key. Pale shading and n.d. indicate  
 984 no change and when a compound was not detected, respectively. Black boxes next to compound  
 985 names signify reactive electrophile species (RES). Asterisks denote significant differences (\*, *P*-value  
 986 < 0.05; \*\*, *P*-value < 0.01) from *t*-tests comparing individual species in seeds before CD with  
 987 seeds after CD at four RHs under H or normoxia N. Values of seeds stored for 20 years with at ~0.06 g  
 988 H<sub>2</sub>O g<sup>-1</sup> DW and low temperatures (seed bank, SB) are also shown. Data are means (*n* = 4 replicates of 50 seeds each) ± SE.

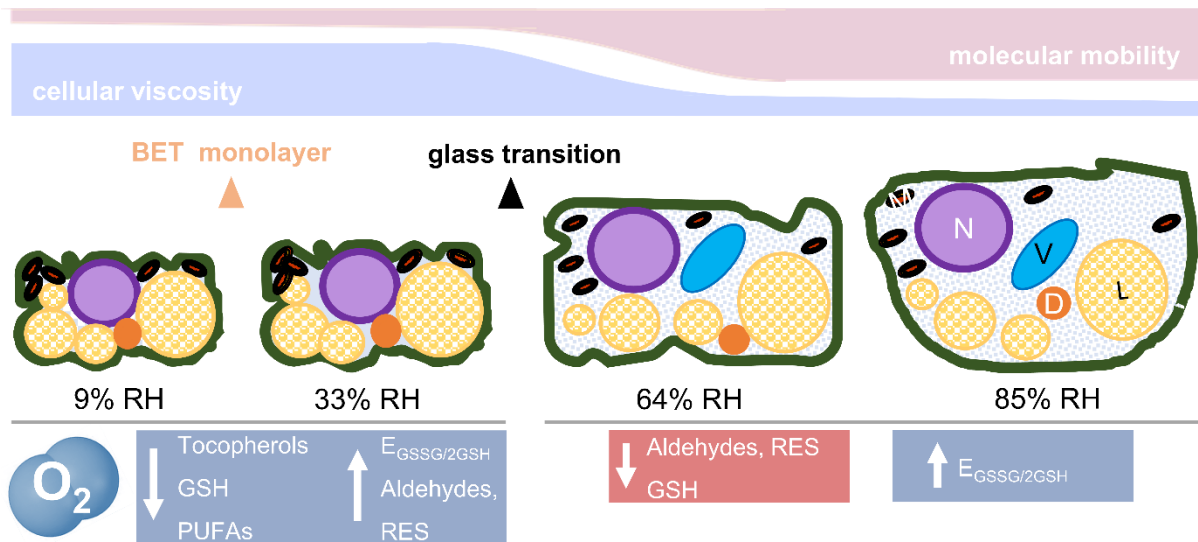

989 **Fig. 7. Schematic overview of the physicochemical changes of *Pinus densiflora* seed cells occurring in**  
 990 **response to relative humidity (RH) and to O<sub>2</sub> availability during controlled deterioration at 45 °C.**  
 991 During drying, the cytoplasm shrinks, reducing the area occupied by the cytosol and forcing in close  
 992 proximity diverse organelles [nucleus (N), vacuole (V), mitochondria (M), and dry matter (D), including  
 993 protein storage bodies and starch granules, the endomembrane system, and liquid lipid bodies (L)].  
 994 Cell walls and membranes are folded. Below a certain moisture content (< 0.05 g H<sub>2</sub>O g<sup>-1</sup> DW or 42%  
 995 RH, as from water sorption isotherms), the seed cytoplasm and organelles solidify (see Fig. 1B), forming  
 996 an amorphous glass. Therefore, most of the seed cytoplasm at 9 and 33% RH (left side) was glassy. In  
 997 addition, at 9% RH, the first monolayer of water molecules adsorbed to the surface of the  
 998 macromolecules (i.e the Brunauer-Emmet-Teller [BET] monolayer) was partially removed, exposing  
 999 some of their areas previously covered by water. In the glassy state, cellular viscosity is high, and  
 1000 molecular mobility is restricted to vibration, bending, and rotation of the side groups of  
 1001 macromolecules. In this physical state, O<sub>2</sub> promoted lipid peroxidation, depletion of tocopherols, and  
 1002 accumulation of aldehydes and reactive electrophile species (RES). Between 42 and 50% RH  
 1003 (corresponding to 0.05 to 0.06 g H<sub>2</sub>O g<sup>-1</sup> DW, see Fig. 1B), the cytoplasm changed from a glassy to a  
 1004 fluid state, which remains very viscous and is also known as "rubbery" state. This was the scenario for  
 1005 seeds aged at 64 and 85% RH (right side). In the fluid state, organelles tend to disperse due to the  
 1006 enlarged volume of the cytosol, and molecular mobility rises in comparison to the glass (i.e. the main  
 1007 chains of macromolecules are enabled to move). The biochemical changes indicated in blue were  
 1008 enhanced by O<sub>2</sub>, and those in red occurred independently of O<sub>2</sub> availability. GSH, glutathione; PUFAs,  
 1009 (poly)unsaturated fatty acids; E<sub>GSSG/2GSH</sub> half-cell reduction potential of the glutathione/glutathione  
 1010 disulphide redox couple. This figure is partly adapted from Ballesteros et al., 2020.
